# Supplementary material for: Photosensitized samarium(iii) and erbium(iii) complexes of planar N,N-donor heterocyclic bases: crystal structures and evaluation of biological activity
Source: Royal Society of Chemistry journal article supplement (doi:10.1039/c5ce02387d), 2016-01-01
Supplement: c5ce02387d1.pdf [file c5ce02387d1.pdf]

## **Electronic Supplementary Information**

### **Photosensitized samarium(III) and erbium(III) complexes of planar *N,N*-donor heterocyclic bases: crystal structures and evaluation of biological activity**

Srikanth Dasari, Zafar Abbas, Priyaranjan Kumar and Ashis K. Patra\*

Department of Chemistry

Indian Institute of Technology Kanpur, Kanpur-208016, Uttar Pradesh, India

|                                                                                                                                                                                                                              |      |
|------------------------------------------------------------------------------------------------------------------------------------------------------------------------------------------------------------------------------|------|
| <b>Table of Contents:</b>                                                                                                                                                                                                    | Page |
| <b>Figures and Tables</b>                                                                                                                                                                                                    |      |
| <b><u>Stability in Solution</u></b>                                                                                                                                                                                          |      |
| <b>Figure S1:</b> Time-dependent UV-visible spectral changes of complexes <b>1-2</b> in DMF.                                                                                                                                 | S4   |
| <b>Figure S2:</b> Time-dependent UV-visible spectral changes of complexes <b>3-4</b> in DMF.                                                                                                                                 | S4   |
| <b>Figure S3:</b> UV-visible absorption spectra of dpq and dppz and excitation spectra of complexes <b>1-4</b>                                                                                                               | S5   |
| <b><u>Photophysical properties</u></b>                                                                                                                                                                                       |      |
| <b>Luminescence properties of the complexes</b>                                                                                                                                                                              |      |
| <b>Figure S4:</b> Time-delayed emission spectra of the complexes <b>3</b> and <b>4</b> in DMF.                                                                                                                               | S6   |
| <b>Figure S5:</b> Time-delayed emission spectra of the complexes <b>1</b> and <b>2</b> with excitation with 365 nm in DMF.                                                                                                   | S7   |
| <b>Figure S6:</b> Time-delayed emission spectra of the complexes <b>3</b> and <b>4</b> with excitation with 365 nm in DMF.                                                                                                   | S8   |
| <b>Figure S7.</b> Luminescence decay profile and lifetime measurement of the complexes <b>1 – 2</b> in H <sub>2</sub> O and D <sub>2</sub> O.                                                                                | S9   |
| <b>Electrochemistry</b>                                                                                                                                                                                                      |      |
| <b>Figure S8.</b> Cyclic voltammograms of the dpq and dppz in DMF.                                                                                                                                                           | S10  |
| <b>Figure S9.</b> Cyclic voltammograms of the complexes [Sm(dpq)(DMF) <sub>2</sub> (H <sub>2</sub> O)Cl <sub>3</sub> ] ( <b>1</b> ) and [Sm(dppz)(DMF) <sub>2</sub> (H <sub>2</sub> O)Cl <sub>3</sub> ] ( <b>2</b> ) in DMF. | S11  |
| <b>Figure S10.</b> Cyclic voltammograms of the complexes [[Er(dpq)(DMF) <sub>2</sub> Cl <sub>3</sub> ] ( <b>3</b> ) and [Er(dppz) <sub>2</sub> Cl <sub>3</sub> ] ( <b>4</b> ) in DMF.                                        | S12  |
| <b><u>Structural data</u></b>                                                                                                                                                                                                |      |
| <b>Figure S11:</b> Unit cell packing diagrams of complexes <b>1</b> (a) and <b>2</b> (b).                                                                                                                                    | S13  |
| <b>Figure S12:</b> Unit cell packing diagrams of complexes <b>3</b> (a) and <b>4</b> (b).                                                                                                                                    | S13  |
| <b>Figure S13.</b> Complex <b>4</b> showing dihedral angle between planes of the bound dppz ligands.                                                                                                                         | S14  |
| <b>Figure S14.</b> Complex <b>4</b> showing favorable $\pi$ - $\pi$ stacking interactions to form one dimensional chain.                                                                                                     | S14  |
| <b>Table S1:</b> Selected bond lengths (Å) and bond angles (deg) for [Sm(dpq)(DMF) <sub>2</sub> (H <sub>2</sub> O) Cl <sub>3</sub> ] ( <b>1</b> ) and [Sm(dppz)(DMF) (H <sub>2</sub> O)Cl <sub>3</sub> ] ( <b>2</b> ).       | S15  |
| <b>Table S2:</b> Selected Bond Lengths (Å) and Bond Angles (deg) for [Er(dpq)(DMF) <sub>2</sub> Cl <sub>3</sub> ] ( <b>3</b> ) and [Er(dppz) <sub>2</sub> Cl <sub>3</sub> ] ( <b>4</b> ).                                    | S16  |

|                                                                                                                                                                                                              |     |
|--------------------------------------------------------------------------------------------------------------------------------------------------------------------------------------------------------------|-----|
| <b>Figure S15:</b> Time-delayed emission spectral titration of the dpq and SmCl <sub>3</sub> ·6H <sub>2</sub> O in DMF.                                                                                      | S17 |
| <b>Figure S16:</b> Time-delayed emission spectral titration of the dppz and SmCl <sub>3</sub> ·6H <sub>2</sub> O in DMF.                                                                                     | S18 |
| <b><u>DNA and BSA binding studies</u></b>                                                                                                                                                                    |     |
| <b>Figure S17:</b> Absorption spectral traces of complex <b>2</b> in Tris-buffer with increasing the concentration of CT-DNA. Inset shows the plot of $\Delta\epsilon_{af}/\Delta\epsilon_{bf}$ vs. [DNA].   | S19 |
| <b>Figure S18:</b> Absorption spectral traces of complex <b>3</b> in Tris-buffer with increasing the concentration of CT-DNA. Inset shows the plot of $\Delta\epsilon_{af}/\Delta\epsilon_{bf}$ vs. [DNA].   | S20 |
| <b>Figure S19:</b> Absorption spectral traces of complex <b>4</b> in Tris-buffer with increasing the concentration of CT-DNA. Inset shows the plot of $\Delta\epsilon_{af}/\Delta\epsilon_{bf}$ vs. [DNA].   | S21 |
| <b>Figure S20:</b> Emission spectral traces of ethidium bromide bound CT-DNA with varying concentration of complex <b>2</b> in 5 mM Tris buffer with inset showing (I/I <sub>0</sub> ) vs. [complex] plot.   | S22 |
| <b>Figure S21:</b> Emission spectral traces of ethidium bromide bound CT-DNA with varying concentration of complex <b>3</b> in 5 mM Tris buffer with inset showing (I/I <sub>0</sub> ) vs. [complex] plot.   | S23 |
| <b>Figure S22:</b> Emission spectral traces of ethidium bromide bound CT-DNA with varying concentration of complex <b>4</b> in 5 mM Tris buffer with inset showing (I/I <sub>0</sub> ) vs. [complex] plot.   | S24 |
| <b>Figure S23:</b> Emission spectral traces of bovine serum albumin (BSA) protein in the presence of increasing concentration of complex <b>1</b> with inset showing (I <sub>0</sub> /I) vs. [complex] plot. | S25 |
| <b>Figure S24:</b> Emission spectral traces of bovine serum albumin (BSA) protein in the presence of increasing concentration of complex <b>3</b> with inset showing (I <sub>0</sub> /I) vs. [complex] plot. | S26 |
| <b>Figure S25:</b> Emission spectral traces of bovine serum albumin (BSA) protein in the presence of increasing concentration of complex <b>4</b> with inset showing (I <sub>0</sub> /I) vs. [complex] plot. | S27 |
| <b><u>DNA cleavage studies</u></b>                                                                                                                                                                           |     |
| <b>Figure S26.</b> Gel electrophoresis diagram showing photocleavage of SC pUC19 DNA with complexes <b>1–4</b> on irradiation with UV-A light of 365 nm with varying exposure time.                          | S28 |
| <b>Figure S27.</b> Bar diagram showing a comparison of the photocleavage of SC pUC19 DNA with complexes <b>1-4</b> on irradiation with UV-A light of 365 nm with varying exposure time.                      | S29 |
| <b>Figure S28:</b> Gel electrophoresis diagram showing photocleavage of SC pUC19 DNA by complexes <b>1</b> and <b>2</b> in presence of various additives.                                                    | S30 |
| <b>Figure S29:</b> Gel electrophoresis diagram showing photocleavage of SC pUC19 DNA by complexes <b>3</b> and <b>4</b> in presence of various additives.                                                    | S30 |

|                                                                                                                                            |     |
|--------------------------------------------------------------------------------------------------------------------------------------------|-----|
| <b>Figure S30:</b> Bar diagram showing Mechanistic photocleavage of SC pUC19 DNA of complexes <b>1-4</b> in presence of various additives. | S31 |
|--------------------------------------------------------------------------------------------------------------------------------------------|-----|

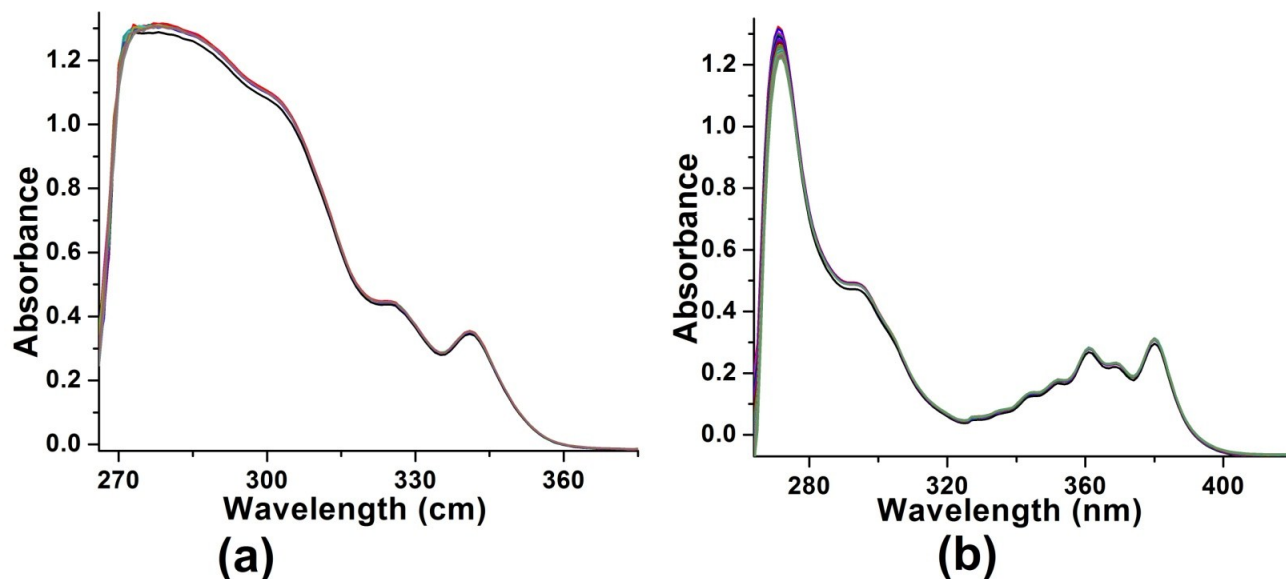

**Figure S1:** Time-dependent absorption spectral traces of complexes [Sm(dpq)(DMF)<sub>2</sub>(H<sub>2</sub>O)Cl<sub>3</sub>](**1**) (100 μM) (a) and [Sm(dppz)(DMF)<sub>2</sub>(H<sub>2</sub>O)Cl<sub>3</sub>](**2**) (50 μM) (b) monitored for 4 h in DMF at 25 °C to access the stability of the complexes in solution.

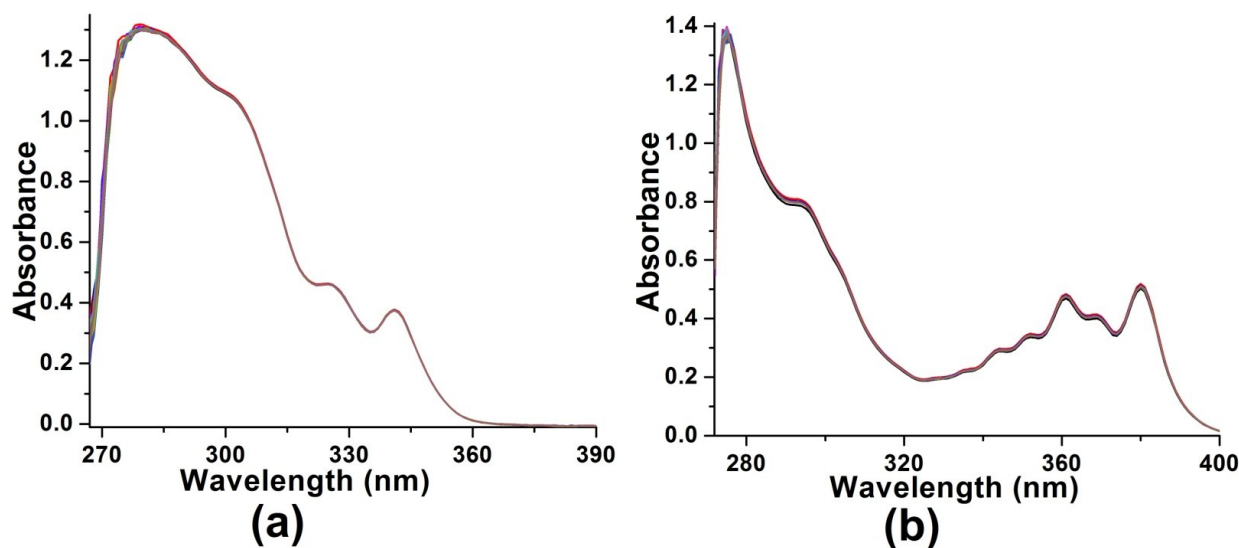

**Figure S2:** Time-dependent absorption spectral traces of complexes [[Er(dpq)(DMF)<sub>2</sub>Cl<sub>3</sub>]] (**3**) (100 μM) (a) and [Er(dppz)<sub>2</sub>Cl<sub>3</sub>] (**4**) (40 μM) (b) monitored for 4 h in DMF at 25 °C to access the stability of the complexes in solution.

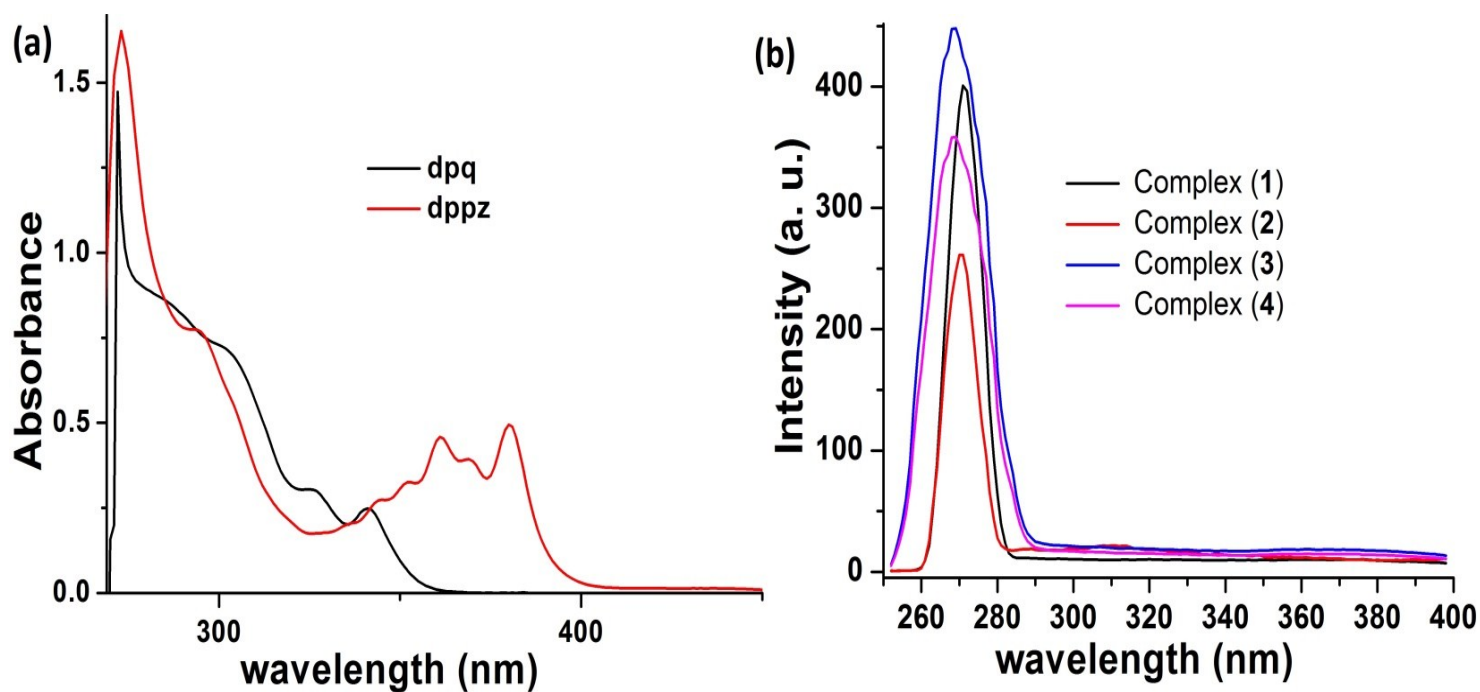

**Figure S3.** (a) UV-visible spectra of dpq ( $20\ \mu\text{M}$ ) and dppz ( $15\ \mu\text{M}$ ) in DMF. (b) Excitation spectra of the complexes **1-4** at  $200\ \mu\text{M}$  in DMF in at 298 K. Excitation and emission slit width = 10 nm,  $\lambda_{\text{em}} = 598\ \text{nm}$  for complexes **1** and **2** and  $\lambda_{\text{em}} = 545\ \text{nm}$  for complexes **3** and **4**.

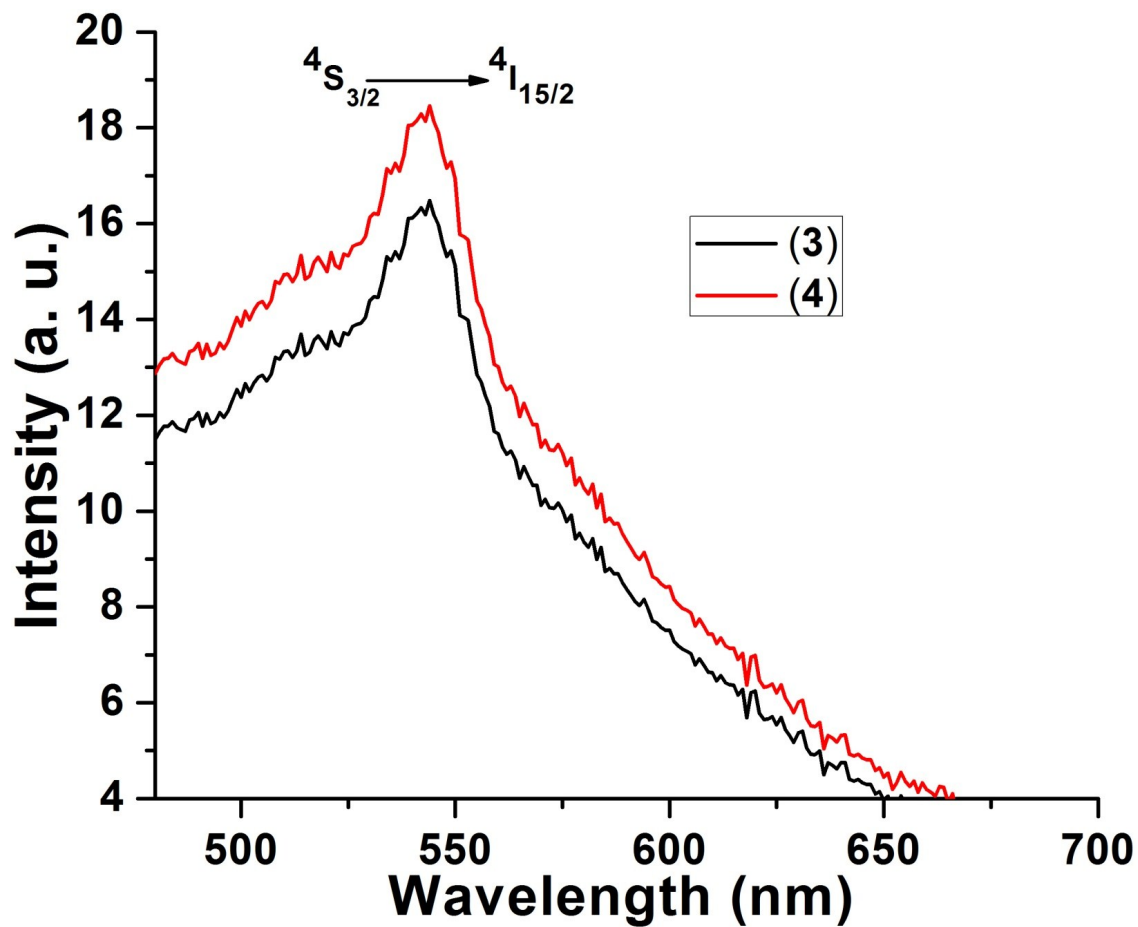

**Figure S4.** Time-delayed luminescence spectra of [Er(dpq)(DMF)<sub>2</sub>Cl<sub>3</sub>](**3**) (black) and [Er(dppz)<sub>2</sub>Cl<sub>3</sub>](**4**) (red) at 200  $\mu$ M in DMF (delay time and gate time = 0.1 ms,  $\lambda_{\text{ex}}$  = 340 and 380 nm). The corresponding  $^4S_{3/2} \rightarrow ^4I_{15/2}$  transitions are shown on the respective spectra.

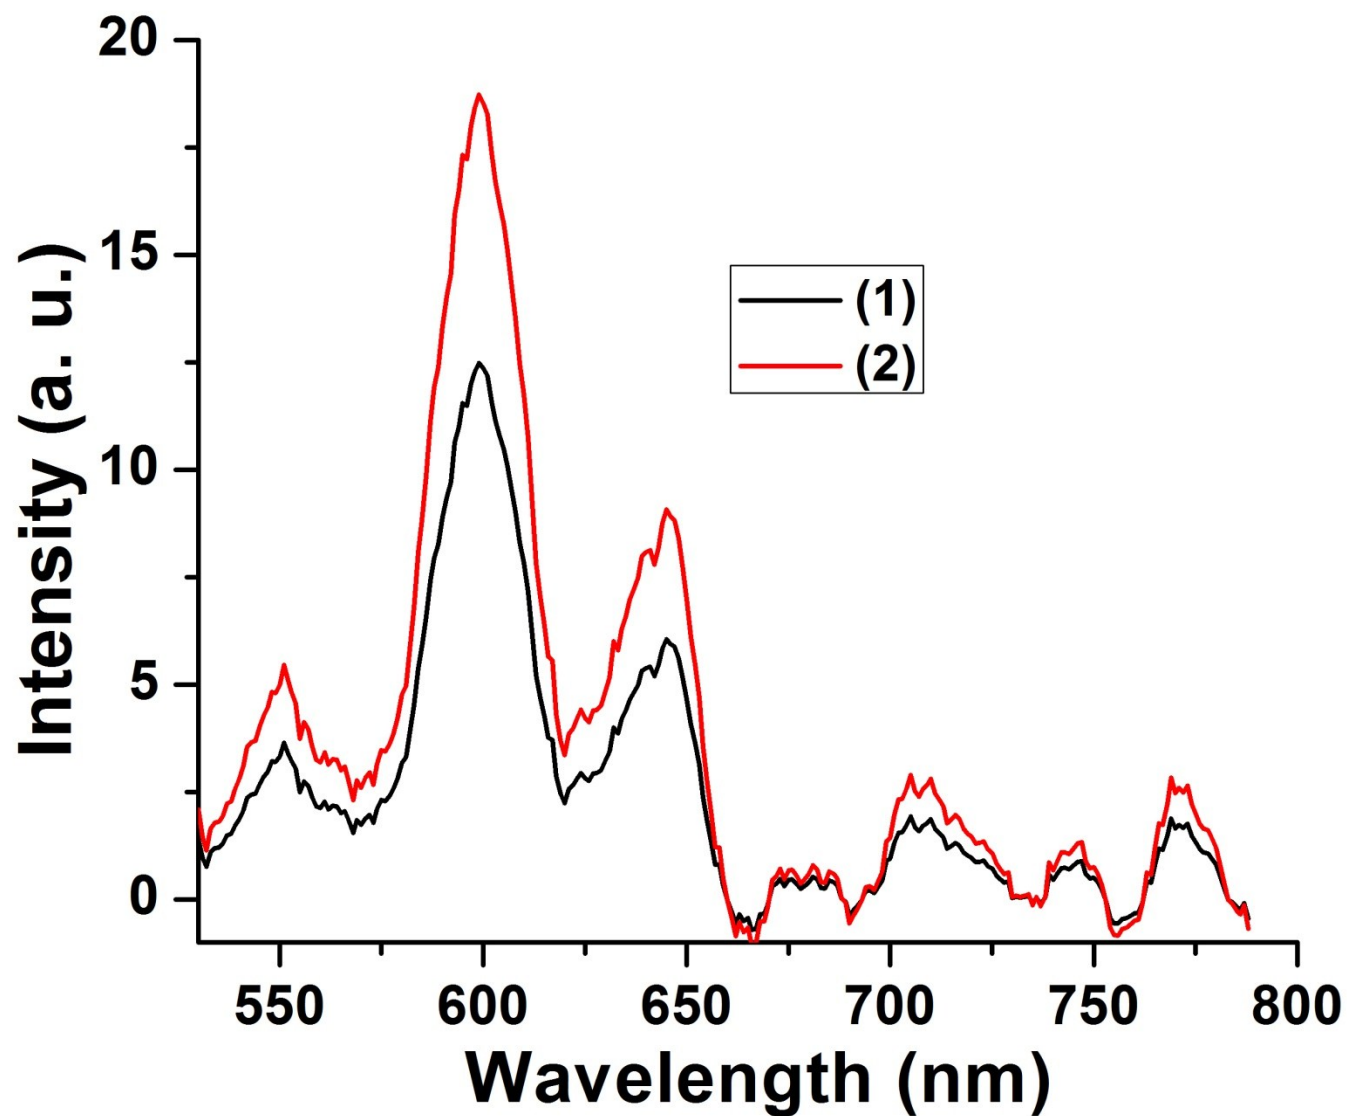

**Figure S5.** Time-delayed luminescence spectra of  $[\text{Sm}(\text{dpq})(\text{DMF})_2(\text{H}_2\text{O})\text{Cl}_3]$  (1) (black) and  $[\text{Sm}(\text{dppz})(\text{DMF})_2(\text{H}_2\text{O})\text{Cl}_3]$  (2) (red) at  $200\ \mu\text{M}$  in DMF (delay time and gate time =  $0.1\ \text{ms}$ ,  $\lambda_{\text{ex}} = 365\ \text{nm}$ ).

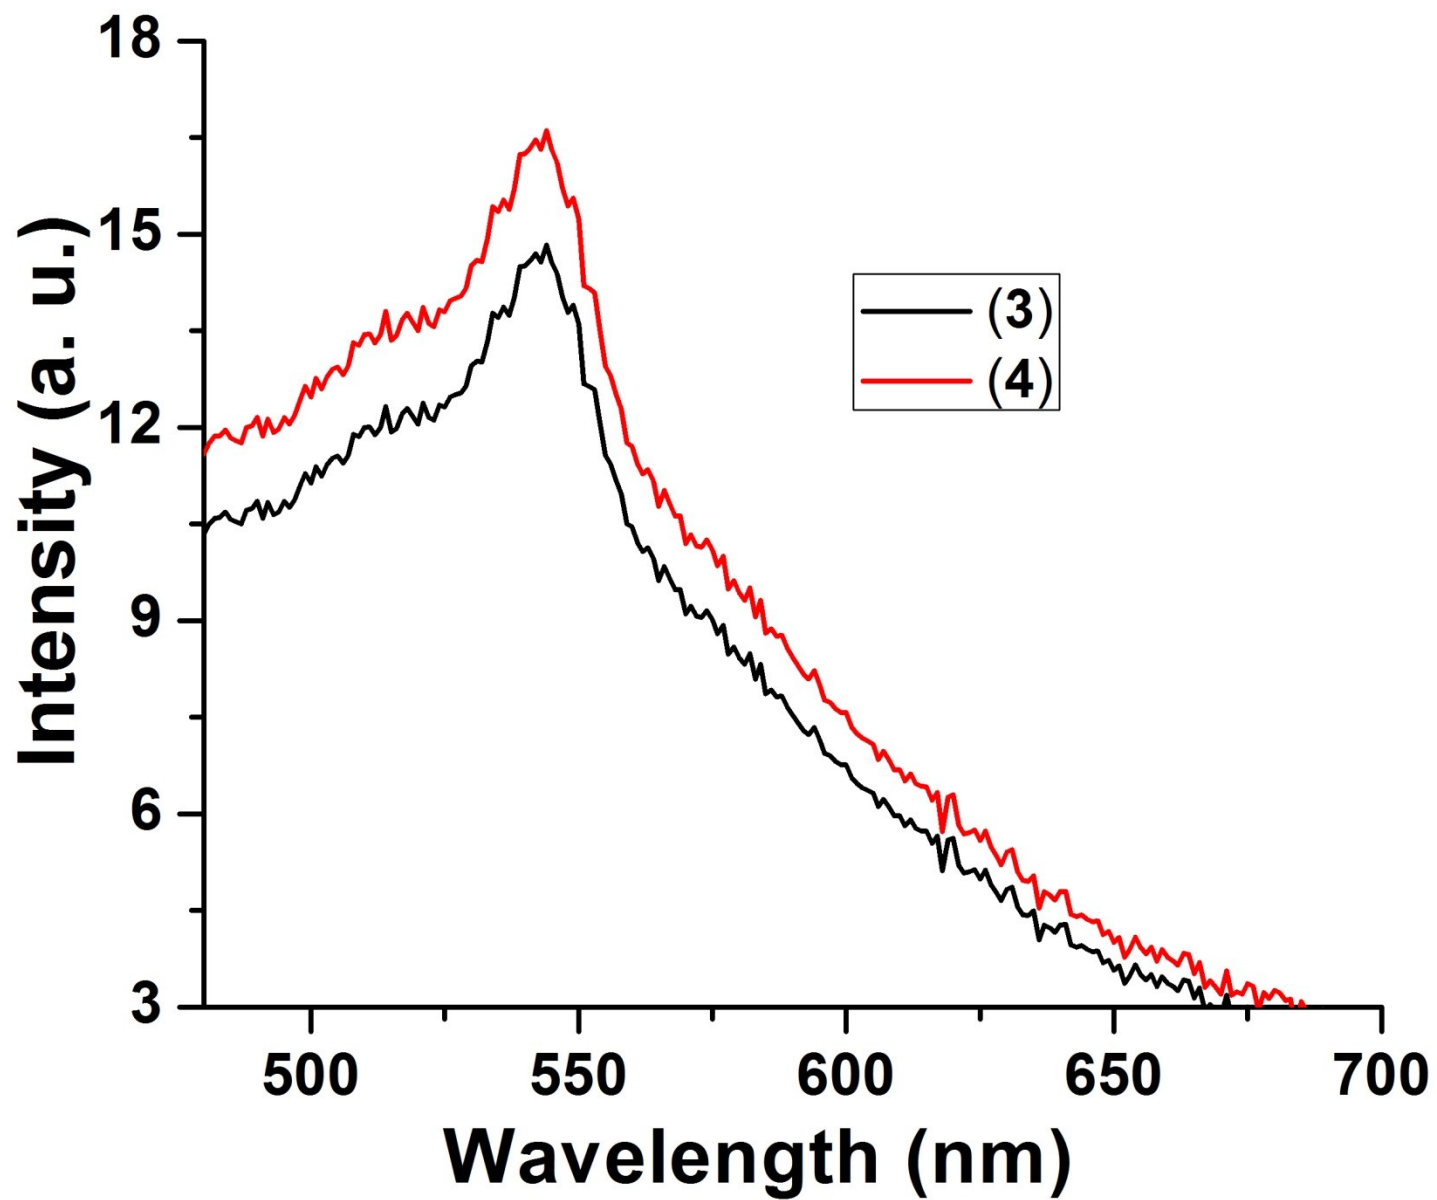

**Figure S6.** Time-delayed luminescence spectra of  $[\text{Er}(\text{dpq})(\text{DMF})_2\text{Cl}_3](\mathbf{3})$  (black) and  $[\text{Er}(\text{dppz})_2\text{Cl}_3](\mathbf{4})$  (red) at  $200\ \mu\text{M}$  in DMF (delay time and gate time =  $0.1\ \text{ms}$ ,  $\lambda_{\text{ex}} = 365\ \text{nm}$ ).



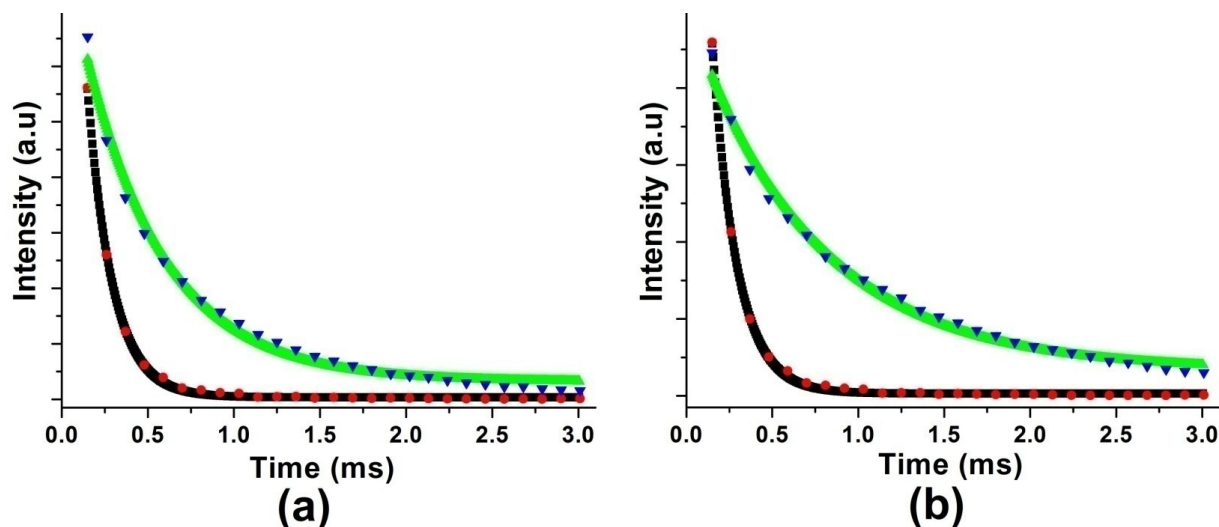

**Figure S7.** Luminescence decay profile from  $^4G_{5/2}$  state and lifetime measurements at 598 nm  $\text{Sm}^{3+}$  in complexes **1–2** (a and b) respectively in  $\text{H}_2\text{O}$  and  $\text{D}_2\text{O}$  under ambient condition at 298 K.  $\lambda_{\text{ex}} = 340$  nm,  $[\text{complex}] = 180 \mu\text{M}$ , delay time and gate time = 0.1 ms, total decay time = 3.0 ms, Ex. and Em. Slit = 10 nm. The black (in  $\text{H}_2\text{O}$ ) and green (in  $\text{D}_2\text{O}$ ) curves are the best fits considering single-exponential behavior of the decay.

Luminescence lifetime ( $\tau$ )<sup>a</sup> and overall quantum yield ( $\phi_{\text{overall}}$ )<sup>b</sup> of the complexes in  $\text{H}_2\text{O}$  and  $\text{D}_2\text{O}$  are shown below.

| Complex  | $\lambda_{\text{ex}}(\text{nm})$ | $\tau^{\text{H}_2\text{O}}(\text{ms})$ | $\tau^{\text{D}_2\text{O}}(\text{ms})$ | $\phi^{\text{H}_2\text{O}}$ | $\phi^{\text{D}_2\text{O}}$ | $\tau^{\text{H}_2\text{O}^c}(\text{ms})$ |
|----------|----------------------------------|----------------------------------------|----------------------------------------|-----------------------------|-----------------------------|------------------------------------------|
| <b>1</b> | 340                              | 0.14                                   | 0.38                                   | 0.048                       | 0.320                       | 0.137( aerated)<br>0.347( degased)       |
| <b>2</b> | 380                              | 0.13                                   | 0.40                                   | 0.0506                      | 0.422                       | 0.126( aerated)<br>0.369( degased)       |
| <b>3</b> | 340                              | 0.10                                   | 0.25                                   | 0.023                       | 0.204                       | 0.103( aerated)<br>0.198( degased)       |
| <b>4</b> | 380                              | 0.11                                   | 0.26                                   | 0.017                       | 0.216                       | 0.113( aerated)<br>0.203( degased)       |

<sup>a</sup>Luminescence lifetime measured from decay profile from  $^4G_{5/2}$  excited state at 598 nm for  $\text{Sm}^{3+}$  complexes and  $^4S_{3/2}$  excited state at 545 nm for  $\text{Er}^{3+}$  complexes within experimental uncertainty of  $\pm 10\%$ . <sup>b</sup>Quinine sulphate was used as a standard for quantum yield calculation, values are within an experimental uncertainty of  $\pm 15\%$ . <sup>c</sup> Lifetime measurements of complex **1–4** under aerated and degassed condition.

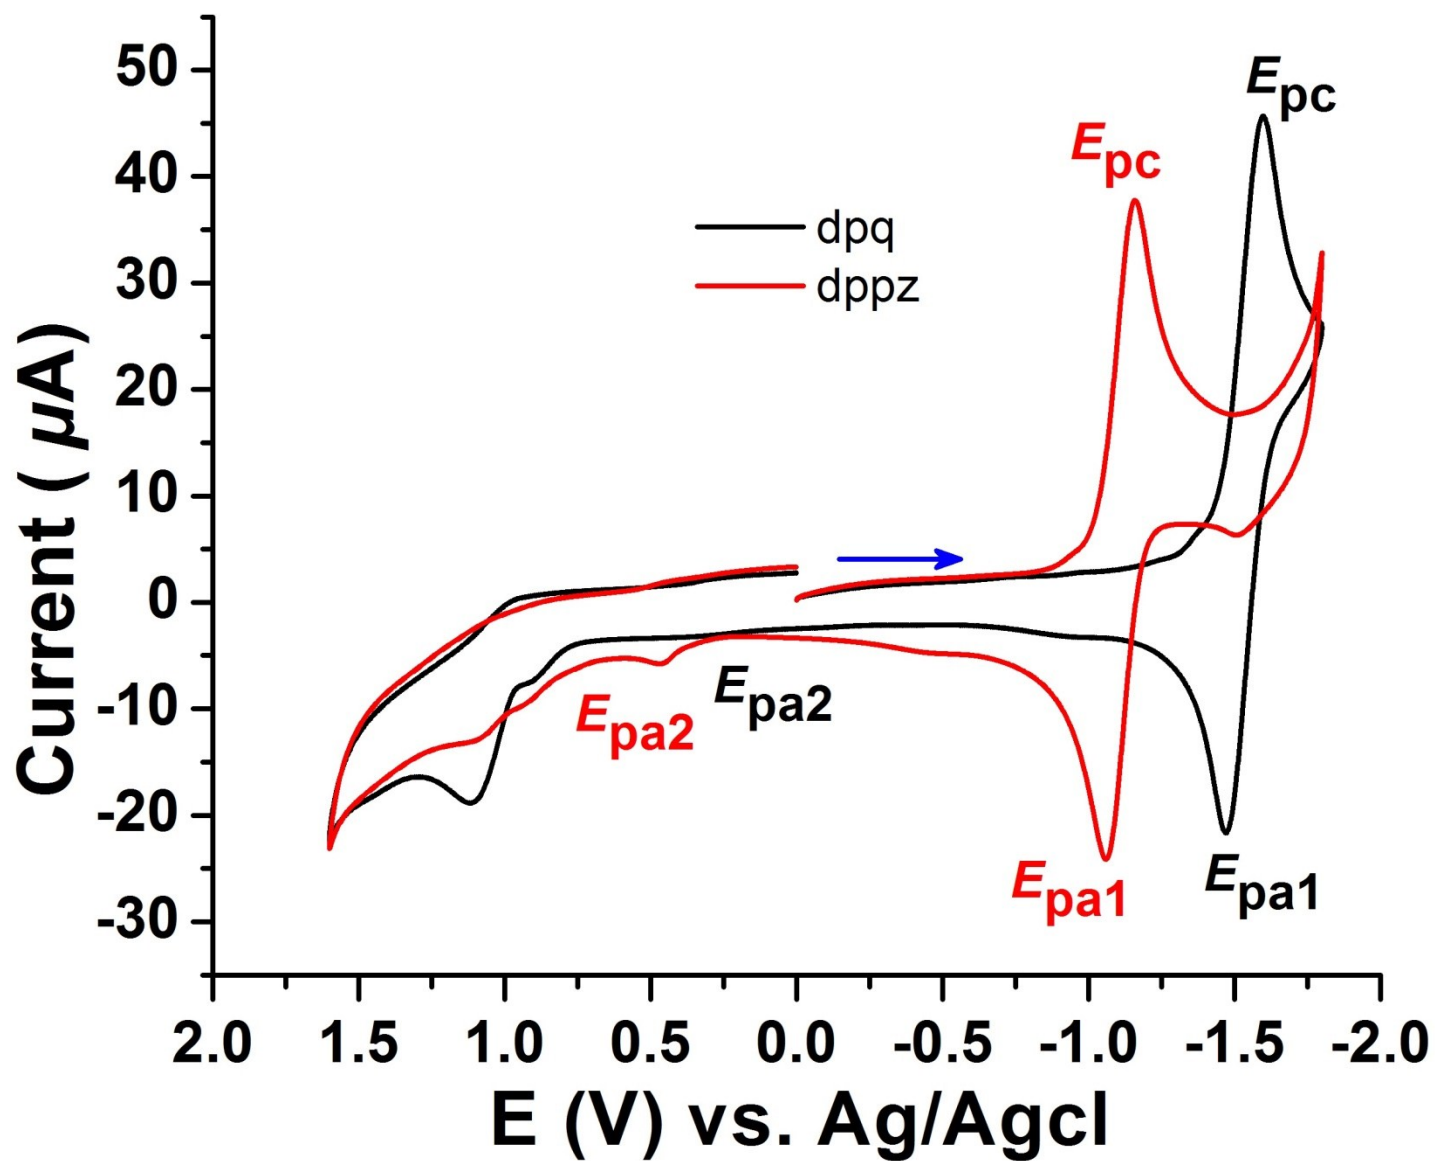

**Figure S8.** Cyclic voltammograms of the dpq and dppz (1 mM) in DMF-0.1M tertabutylammonium perchlorate (TBAP) as supporting electrolyte at a scan speed of  $100 \text{ mV s}^{-1}$  at  $25^\circ\text{C}$ .

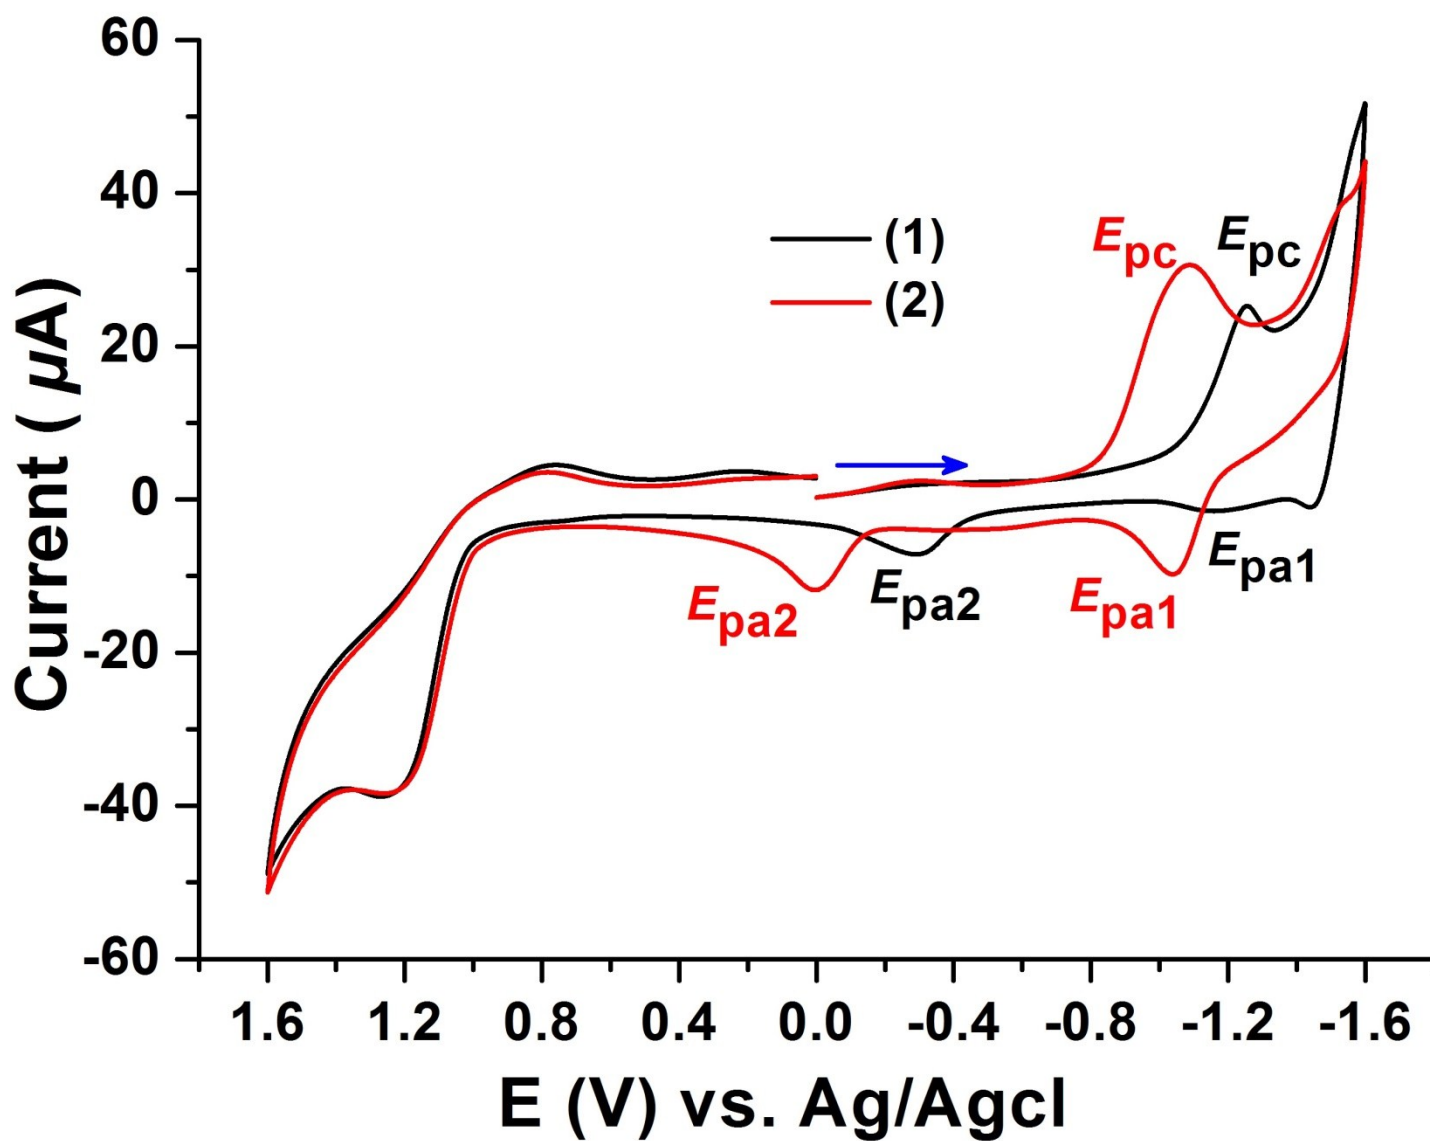

**Figure S9.** Cyclic voltammograms of the complexes  $[\text{Sm}(\text{dpq})(\text{DMF})_2(\text{H}_2\text{O})\text{Cl}_3]$  (1) and  $[\text{Sm}(\text{dppz})(\text{DMF})_2(\text{H}_2\text{O})\text{Cl}_3]$  (2) (1 mM) in DMF-0.1M tertabutylammonium perchlorate (TBAP) as supporting electrolyte at a scan speed of  $100 \text{ mV s}^{-1}$  at  $25^\circ\text{C}$ .

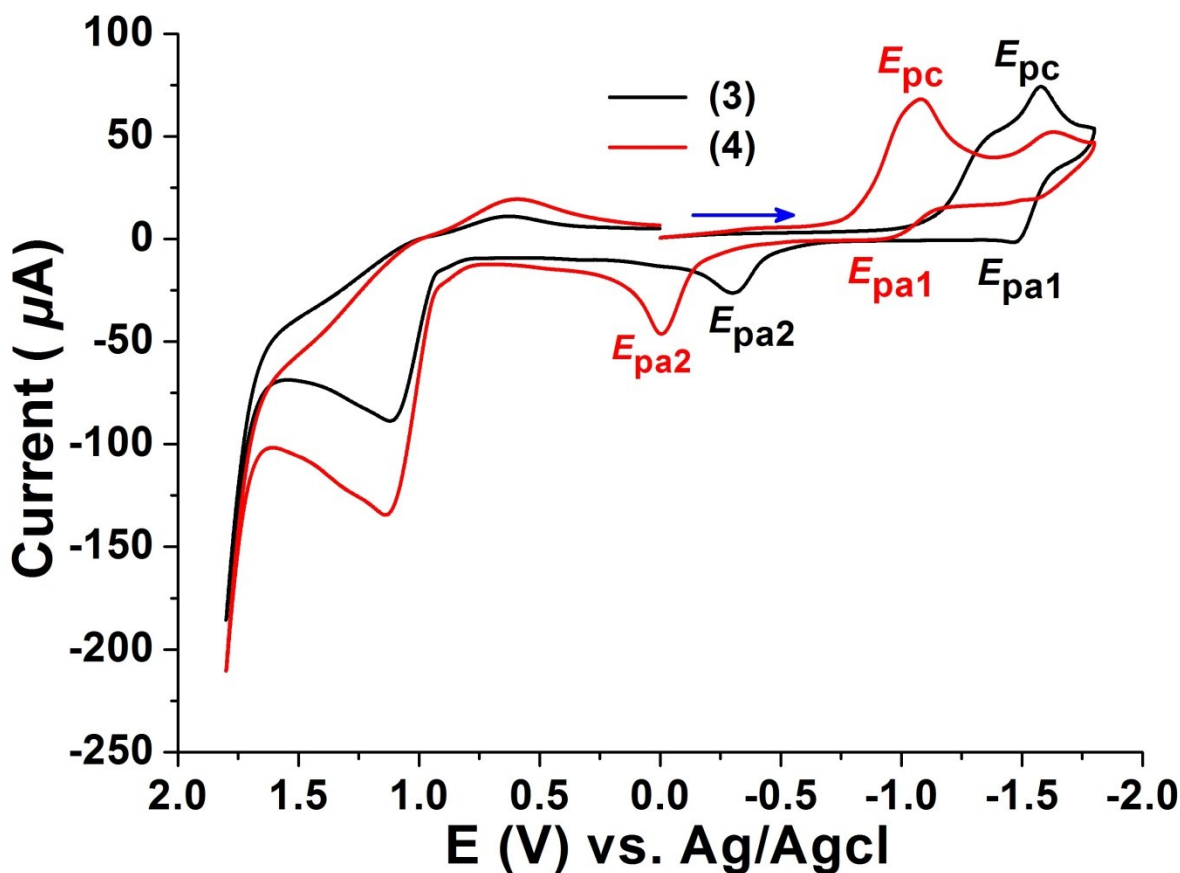

**Figure S10.** Cyclic voltammograms of the complexes  $[\text{Er}(\text{dpq})(\text{DMF})_2\text{Cl}_3]$  (**3**) and  $[\text{Er}(\text{dppz})_2\text{Cl}_3]$  (**4**) (1 mM) in DMF -0.1M tertabutylammonium perchlorate (TBAP) as supporting electrolyte at a scan speed of  $100 \text{ mV s}^{-1}$  at  $25^\circ\text{C}$ .

**Table.** Cyclic voltammetry data of the ligands and complexes **1-4**.

| Compounds   | $E_{\text{pc}}$ (V) | $E_{\text{pa}}$ (V) | $E_{1/2}$ | $\Delta E_{\text{p}}$ (V) | $i_{\text{pa}}/i_{\text{pc}}$ |
|-------------|---------------------|---------------------|-----------|---------------------------|-------------------------------|
| <b>dpq</b>  | -1.582              | -1.479              | -1.53     | -0.103                    | 0.88                          |
| <b>dppz</b> | -1.165              | -0.358              | -1.113    | -0.104                    | 0.90                          |
|             |                     | -1.061              |           |                           |                               |
| <b>1</b>    | -1.245              | -0.464              | -1.20     | -0.090                    | 0.40                          |
|             |                     | -1.155              |           |                           |                               |
| <b>2</b>    | -1.142              | -0.324              | -1.098    | -0.088                    | 0.71                          |
|             |                     | -1.054              |           |                           |                               |
| <b>3</b>    | -1.580              | -0.016              | -1.522    | -0.116                    | 0.42                          |
|             |                     | -1.464              |           |                           |                               |
| <b>4</b>    | -1.085              | -0.304              | -1.0315   | -0.107                    | 0.50                          |
|             |                     | -0.978              |           |                           |                               |
|             |                     | -0.012              |           |                           | 0.31                          |

$E_{\text{pc}}$  and  $E_{\text{pa}}$  are the cathodic and anodic peak potentials,  $i_{\text{pa}}$  and  $i_{\text{pc}}$  are the anodic and cathodic peak currents,  $E_{1/2}$  is the half-wave potential respectively.

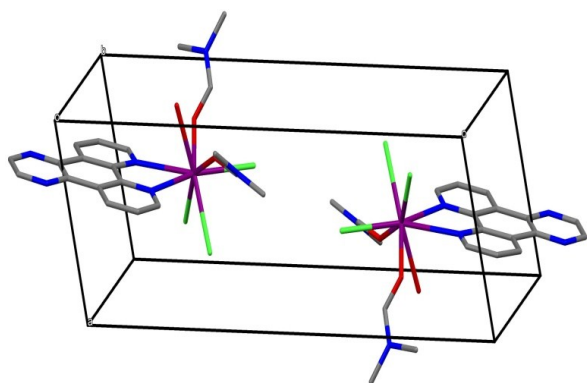

**(a)**

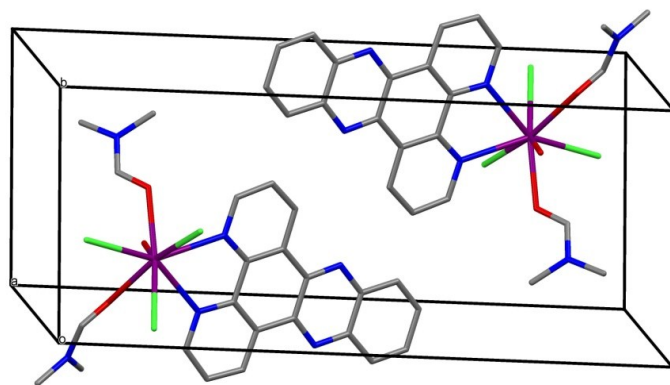

**(b)**

**Figure S11.** Unit cell packing diagram of complex 1(a) and complex 2(b).

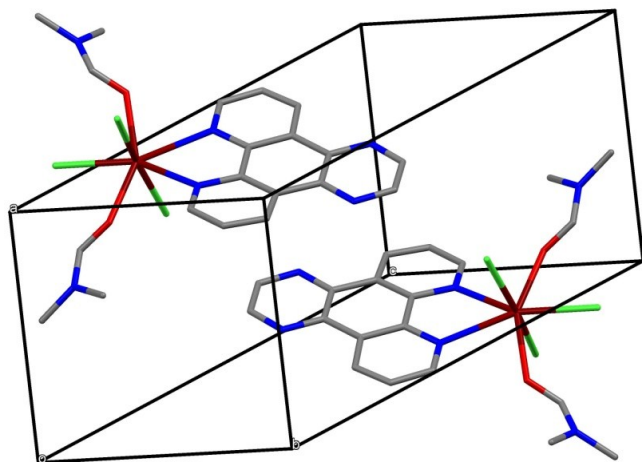

**(a)**

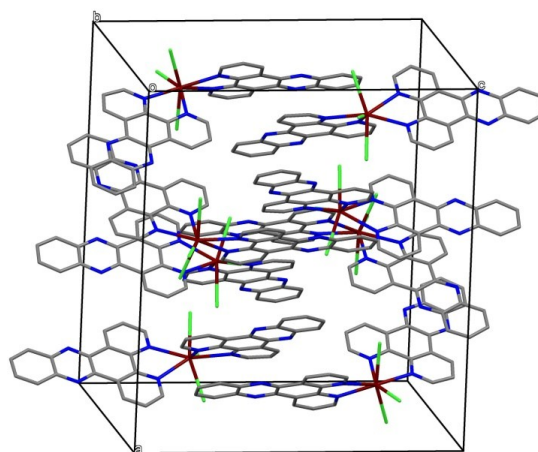

**(b)**

**Figure S12.** Unit cell packing diagram of complex 3 (a) and complex 4 (b).

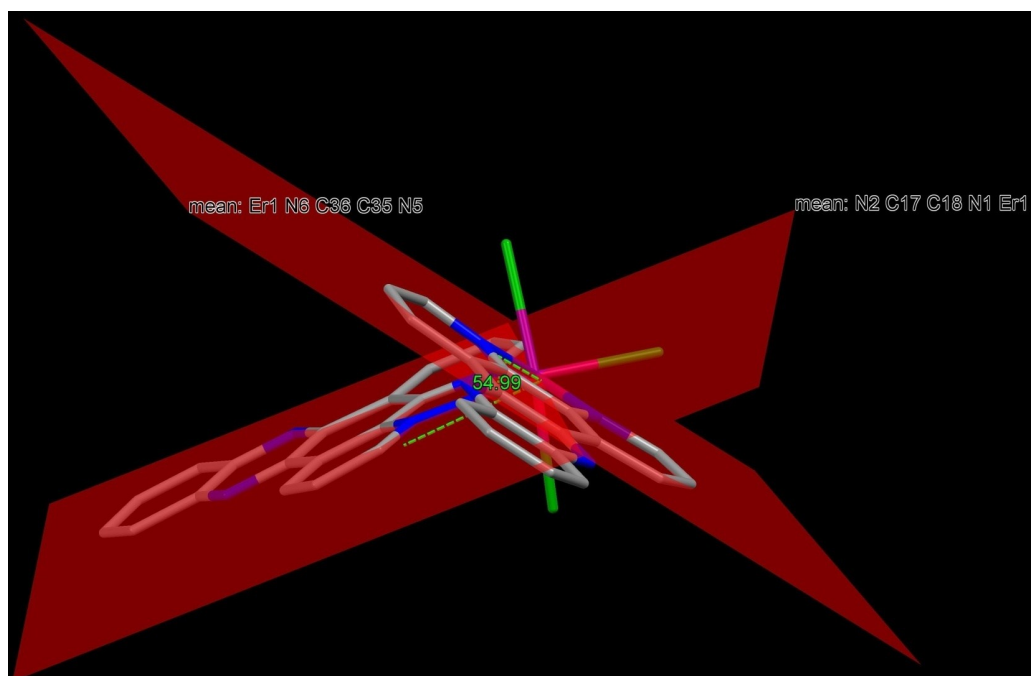

**Figure S13.** Dihedral angle between the planes of the bound dppz ligands in complex **4**.

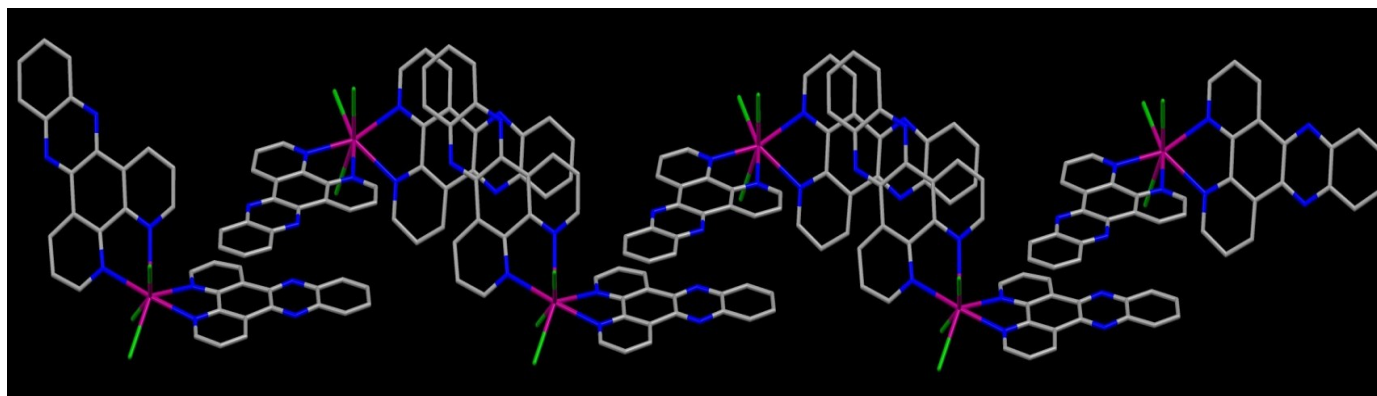

**Figure S14.** Complex **4** showing favorable  $\pi$ - $\pi$  stacking interactions to form one dimensional chain.

**Table S1:** Selected bond lengths (Å) and bond angles (deg) for [Sm(dpq)(DMF)<sub>2</sub>(H<sub>2</sub>O)Cl<sub>3</sub>] (1) and [Sm(dppz)(DMF)<sub>2</sub>(H<sub>2</sub>O)Cl<sub>3</sub>] (2)

| [Sm(dpq)(DMF) <sub>2</sub> (H <sub>2</sub> O)Cl <sub>3</sub> ](1) |            | [Sm(dppz)(DMF) <sub>2</sub> (H <sub>2</sub> O)Cl <sub>3</sub> ](2) |            |
|-------------------------------------------------------------------|------------|--------------------------------------------------------------------|------------|
| <b>Bond lengths (Å)</b>                                           |            | <b>Bond lengths (Å)</b>                                            |            |
| Sm(1)-Cl(1)                                                       | 2.7080(10) | Sm(1)-Cl(1)                                                        | 2.7134(11) |
| Sm(1)-Cl(2)                                                       | 2.8108(8)  | Sm(1)-Cl(2)                                                        | 2.8074(10) |
| Sm(1)-Cl(3)                                                       | 2.7767(9)  | Sm(1)-Cl(3)                                                        | 2.7612(10) |
| Sm(1)- N(1)                                                       | 2.678(2)   | Sm(1)- N(1)                                                        | 2.687(3)   |
| Sm(1)-N(2)                                                        | 2.662(2)   | Sm(1)-N(2)                                                         | 2.643(3)   |
| Sm(1)-O(1)                                                        | 2.419(2)   | Sm(1)-O(1)                                                         | 2.405(3)   |
| Sm(1)-O(2)                                                        | 2.437(2)   | Sm(1)-O(2)                                                         | 2.424(3)   |
| Sm(1)-O(3)                                                        | 2.455(2)   | Sm(1)-O(3)                                                         | 2.452(3)   |
| <b>Bond Angles (deg)</b>                                          |            | <b>Bond Angles (deg)</b>                                           |            |
| O(1)-Sm(1)-O(2)                                                   | 119.15(7)  | O(1)-Sm(1)-O(2)                                                    | 118.95(10) |
| O(1)-Sm(1)-O(3)                                                   | 66.55(7)   | O(1)-Sm(1)-O(3)                                                    | 66.91(10)  |
| O(2)-Sm(1)-O(3)                                                   | 69.33(7)   | O(2)-Sm(1)-O(3)                                                    | 69.36(10)  |
| O(1)-Sm(1)-N(2)                                                   | 73.30(7)   | O(1)-Sm(1)-N(2)                                                    | 74.66(10)  |
| O(2)-Sm(1)-N(2)                                                   | 128.64(7)  | O(2)-Sm(1)-N(2)                                                    | 129.68(10) |
| O(3)-Sm(1)-N(2)                                                   | 73.11(8)   | O(3)-Sm(1)-N(2)                                                    | 74.68(10)  |
| O(1)-Sm(1)-N(1)                                                   | 124.65(8)  | O(1)-Sm(1)-N(1)                                                    | 124.68(10) |
| O(2)-Sm(1)-N(1)                                                   | 74.42(7)   | O(2)-Sm(1)-N(1)                                                    | 74.56(10)  |
| O(3)-Sm(1)-N(1)                                                   | 71.38(8)   | O(3)-Sm(1)-N(1)                                                    | 70.77(10)  |
| N(2)-Sm(1)-N(1)                                                   | 61.03(7)   | N(2)-Sm(1)-N(1)                                                    | 60.85(10)  |
| O(1)-Sm(1)-Cl(1)                                                  | 79.20(6)   | O(1)-Sm(1)-Cl(1)                                                   | 78.63(7)   |
| O(2)-Sm(1)-Cl(1)                                                  | 76.78(5)   | O(2)-Sm(1)-Cl(1)                                                   | 75.84(8)   |
| O(3)-Sm(1)-Cl(1)                                                  | 107.88(6)  | O(3)-Sm(1)-Cl(1)                                                   | 107.08(8)  |
| N(2)-Sm(1)-Cl(1)                                                  | 149.44(5)  | N(2)-Sm(1)-Cl(1)                                                   | 149.98(7)  |
| N(1)-Sm(1)-Cl(1)                                                  | 149.29(5)  | N(1)-Sm(1)-Cl(1)                                                   | 148.91(8)  |
| O(1)-Sm(1)-Cl(3)                                                  | 155.42(5)  | O(1)-Sm(1)-Cl(3)                                                   | 154.81(7)  |
| O(2)-Sm(1)-Cl(3)                                                  | 78.51(6)   | O(2)-Sm(1)-Cl(3)                                                   | 79.60(7)   |
| O(3)-Sm(1)-Cl(3)                                                  | 138.02(5)  | O(3)-Sm(1)-Cl(3)                                                   | 138.27(7)  |
| N(2)-Sm(1)-Cl(3)                                                  | 110.32(6)  | N(2)-Sm(1)-Cl(3)                                                   | 107.69(7)  |
| N(1)-Sm(1)-Cl(3)                                                  | 74.58(6)   | N(1)-Sm(1)-Cl(3)                                                   | 74.63(7)   |
| Cl(1)-Sm(1)-Cl(3)                                                 | 89.52(3)   | Cl(1)-Sm(1)-Cl(3)                                                  | 90.91(3)   |
| O(1)-Sm(1)-Cl(2)                                                  | 75.73(5)   | O(1)-Sm(1)-Cl(2)                                                   | 74.95(7)   |
| O(2)-Sm(1)-Cl(2)                                                  | 153.60(6)  | O(2)-Sm(1)-Cl(2)                                                   | 152.65(7)  |
| O(3)-Sm(1)-Cl(2)                                                  | 135.90(5)  | O(3)-Sm(1)-Cl(2)                                                   | 136.15(7)  |
| N(2)-Sm(1)-Cl(2)                                                  | 74.90(5)   | N(2)-Sm(1)-Cl(2)                                                   | 75.08(7)   |
| N(1)-Sm(1)-Cl(2)                                                  | 116.80(5)  | N(1)-Sm(1)-Cl(2)                                                   | 118.74(8)  |
| Cl(1)-Sm(1)-Cl(2)                                                 | 85.73(2)   | Cl(1)-Sm(1)-Cl(2)                                                  | 85.00(3)   |
| Cl(3)-Sm(1)-Cl(2)                                                 | 81.76(3)   | Cl(3)-Sm(1)-Cl(2)                                                  | 81.40(3)   |

**Table S2:** Selected bond lengths (Å) and bond angles (deg) for [Er(dpq)(DMF)<sub>2</sub>Cl<sub>3</sub>] (**3**) and [Er(dppz)<sub>2</sub>Cl<sub>3</sub>] (**4**)

| [Er(dpq)(DMF) <sub>2</sub> Cl <sub>3</sub> ] ( <b>3</b> ) |            | [Er(dppz) <sub>2</sub> Cl <sub>3</sub> ] ( <b>4</b> ) |            |
|-----------------------------------------------------------|------------|-------------------------------------------------------|------------|
| <b>Bond lengths (Å)</b>                                   |            | <b>Bond lengths (Å)</b>                               |            |
| Er(1)-N(1)                                                | 2.558(13)  | Er1-N1                                                | 2.479(3)   |
| Er(1)-N(2)                                                | 2.519(13)  | Er1-N2                                                | 2.509(3)   |
| Er(1)-Cl(1)                                               | 2.645(4)   | Er1-N5                                                | 2.503(3)   |
| Er(1)-Cl(2)                                               | 2.599(4)   | Er1- N6                                               | 2.506(3)   |
| Er(1)-Cl(3)                                               | 2.588(4)   | Er1- Cl1                                              | 2.5655(11) |
| Er(1)-O(1)                                                | 2.299(10)  | Er1-Cl2                                               | 2.6124(12) |
| Er(1)-O(2)                                                | 2.303(11)  | Er1-Cl3                                               | 2.6014(11) |
| <b>Bond Angles (deg)</b>                                  |            | <b>Bond Angles (deg)</b>                              |            |
| O(1)-Er(1)-O(2)                                           | 150.9(4)   | Cl1 Er1 Cl2                                           | 88.46(4)   |
| O(1)-Er(1)-N(2)                                           | 75.1(4)    | Cl1 Er1 Cl3                                           | 89.26(4)   |
| O(2)-Er(1)-N(2)                                           | 128.2(4)   | Cl3 Er1 Cl2                                           | 160.41(3)  |
| O(1)-Er(1)-N(1)                                           | 135.9(4)   | N1 Er1 Cl1                                            | 90.95(8)   |
| O(2)-Er(1)-N(1)                                           | 72.8(4)    | N1 Er1 Cl2                                            | 77.12(8)   |
| N(2)-Er(1)-N(1)                                           | 64.2(4)    | N1 Er1 Cl3                                            | 83.47(8)   |
| O(1)-Er(1)-Cl(3)                                          | 87.9(3)    | N1 Er1 N2                                             | 65.83(10)  |
| O(2)-Er(1)-Cl(3)                                          | 107.3(3)   | N1 Er1 N5                                             | 160.19(11) |
| N(2)-Er(1)-Cl(3)                                          | 89.5(3)    | N1 Er1 N6                                             | 130.52(11) |
| N(1)-Er(1)-Cl(3)                                          | 76.2(3)    | N2 Er1 Cl1                                            | 153.84(8)  |
| O(1)-Er(1)-Cl(2)                                          | 85.5(3)    | N2 Er1 Cl2                                            | 97.33(8)   |
| O(2)-Er(1)-Cl(2)                                          | 83.4(3)    | N2 Er1 Cl3                                            | 76.78(8)   |
| N(2)-Er(1)-Cl(2)                                          | 78.4(3)    | N5 Er1 Cl1                                            | 84.29(8)   |
| N(1)-Er(1)-Cl(2)                                          | 101.4(3)   | N5 Er1 Cl2                                            | 121.81(8)  |
| Cl(3)-Er(1)-Cl(2)                                         | 167.33(12) | N5 Er1 Cl3                                            | 77.26(8)   |
| O(1)-Er(1)-Cl(1)                                          | 78.7(3)    | N5 Er1 N2                                             | 113.29(11) |
| O(2)-Er(1)-Cl(1)                                          | 76.3(3)    | N5 Er1 N6                                             | 64.55(12)  |
| N(2)-Er(1)-Cl(1)                                          | 153.7(3)   | N6 Er1 Cl1                                            | 130.12(8)  |
| N(1)-Er(1)-Cl(1)                                          | 141.2(3)   | N6 Er1 Cl2                                            | 77.84(9)   |
| Cl(3)-Er(1)-Cl(1)                                         | 91.35(12)  | N6 Er1 Cl3                                            | 117.80(9)  |
| Cl(2)-Er(1)-Cl(1)                                         | 97.88(12)  | N6 Er1 N2                                             | 76.00(10)  |



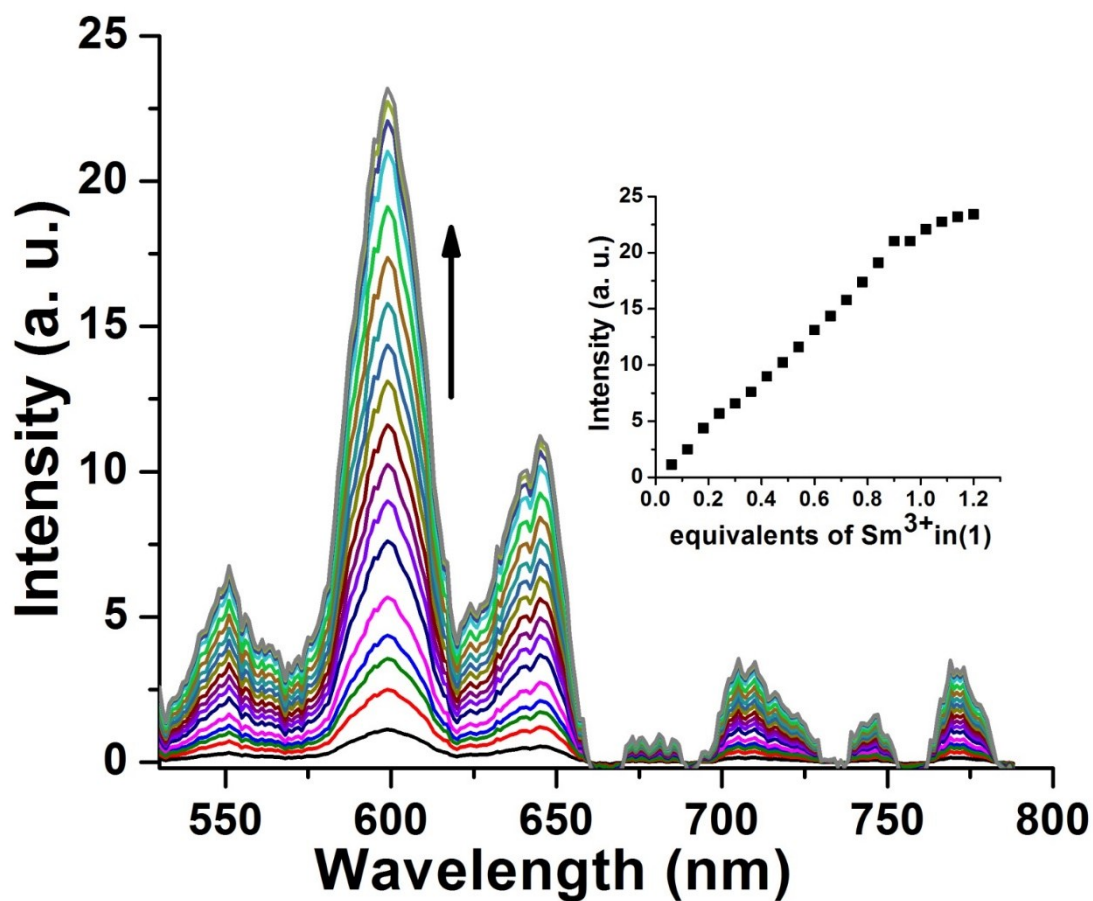

**Figure 15.** Time-delayed luminescence titration of  $\text{SmCl}_3 \cdot 6\text{H}_2\text{O}$  in DMF upon addition of dpq in DMF solution (delay time, gate time = 0.1 ms,  $\lambda_{\text{ex}} = 340 \text{ nm}$ , excitation slit width = 10 nm and emission slit width = 10 nm). Inset figure shows the luminescence intensity changes detected at  $\lambda_{\text{em}} = 598 \text{ nm}$  vs.  $[\text{Sm(III)}]/[\text{dpq}]$ . Calculated binding constant ( $K_{\text{ML}}$ )<sup>a</sup> =  $4.86 \times 10^4 \text{ M}^{-1}$ .

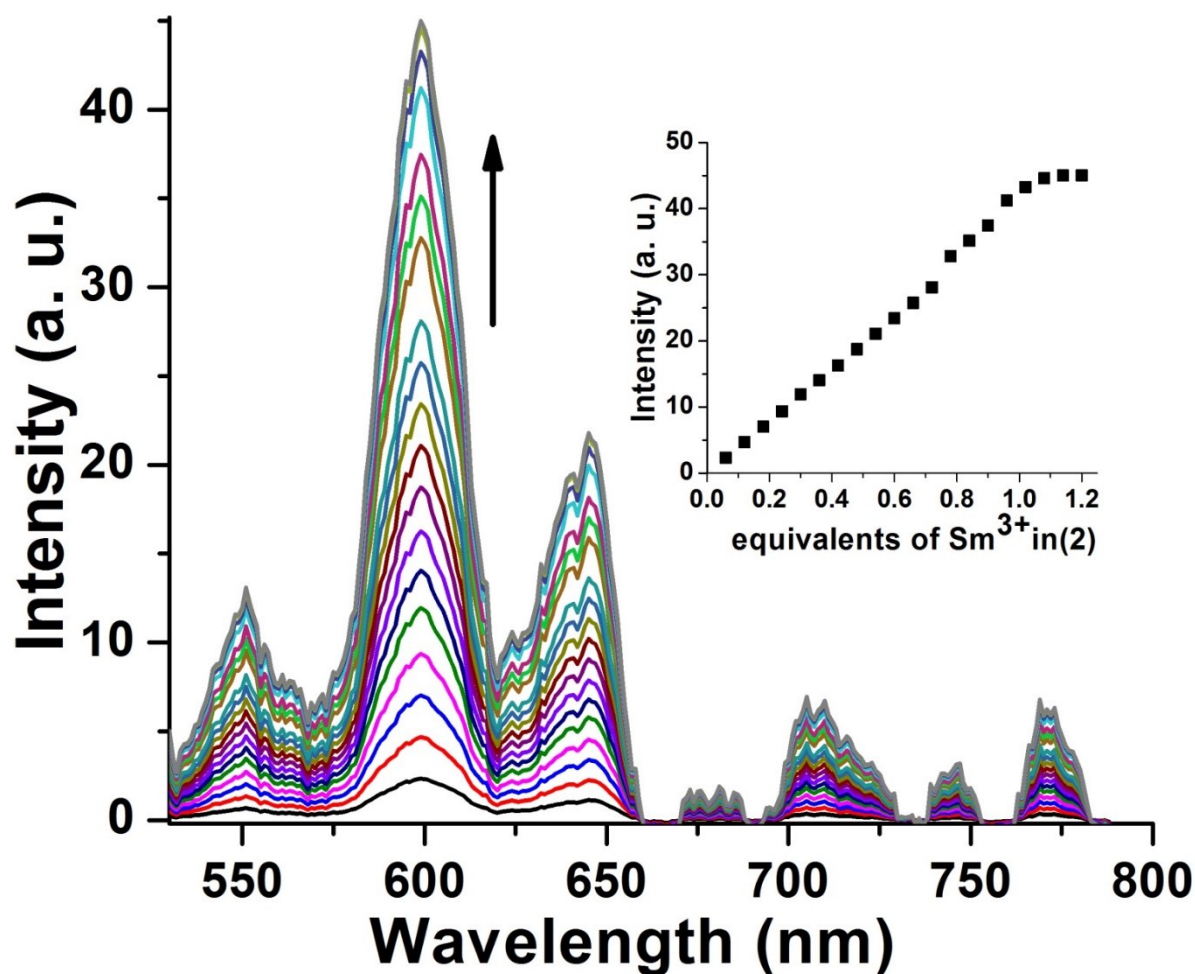

**Figure 16.** Time-delayed luminescence titration of  $\text{SmCl}_3 \cdot 6\text{H}_2\text{O}$  in DMF upon addition of dpq in DMF solution (delay time, gate time = 0.1 ms,  $\lambda_{\text{ex}} = 340$  nm, excitation slit width = 10 nm and emission slit width = 10 nm). Inset figure shows the luminescence intensity changes detected at  $\lambda_{\text{em}} = 598$  nm vs.  $[\text{SmCl}_3 \cdot 6\text{H}_2\text{O}]/[\text{dppz}]$ . Calculated binding constant ( $K_{\text{ML}}$ )<sup>a</sup> =  $5.18 \times 10^4 \text{ M}^{-1}$ .

<sup>a</sup>Binding constants were calculated using reported procedure in (a) S. Quici, M. Cavazzini, G. Marzanni, G. Accorsi, N. Armaroli, B. Ventura, and F. Barigelletti, *Inorg. Chem.*, 2005, **44**, 529-537; (b) J. Bourson, J. Pouget, and B. Valeur, *J. Phys. Chem.*, 1993, **97**, 4552-4557.

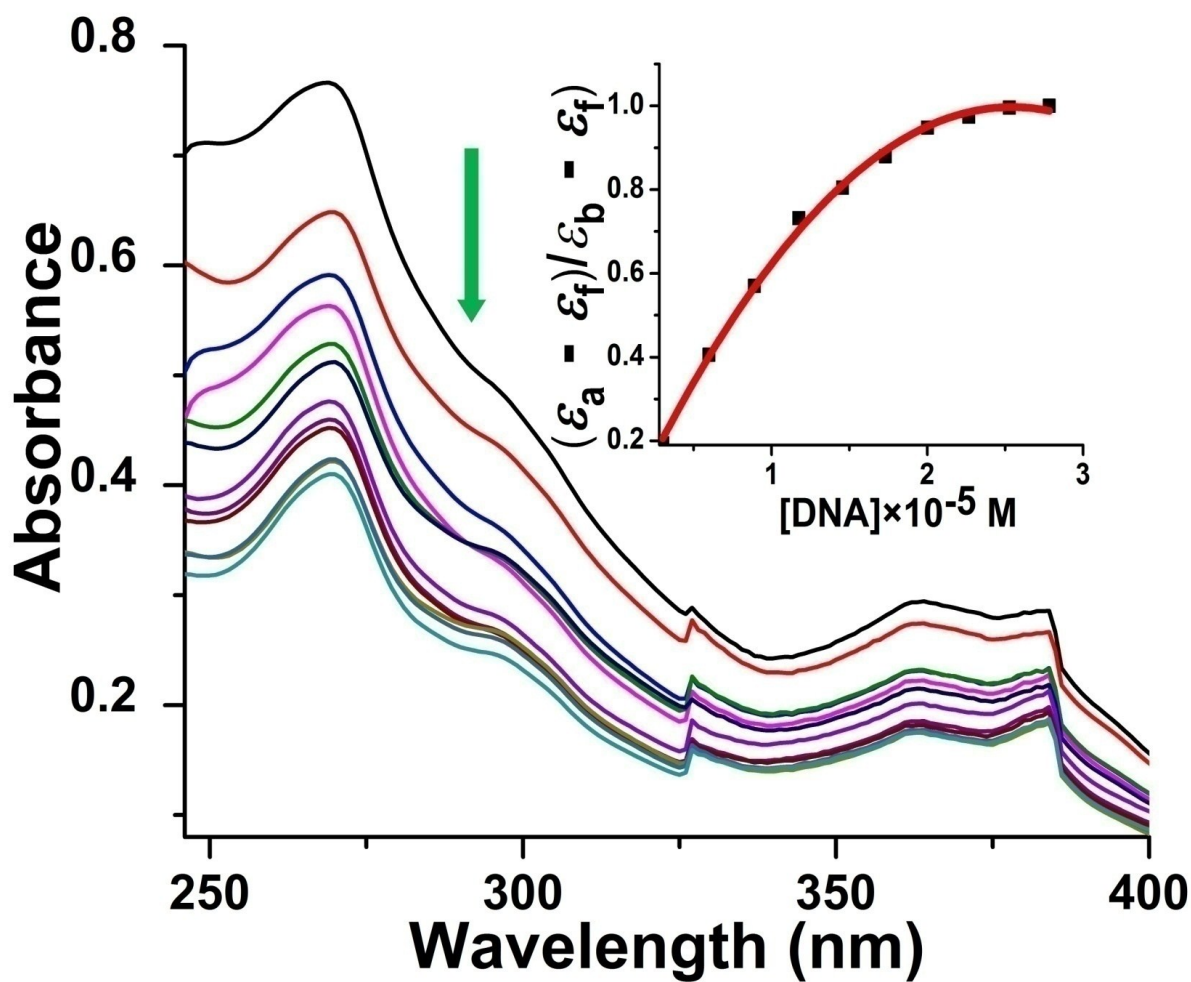

**Figure 17.** Absorption spectral traces of complex 2 (56  $\mu\text{M}$ ) in 5 mM Tris-HCl buffer (pH 7.2) with increasing the concentration of CT-DNA. Inset shows the plot of  $\Delta\epsilon_{af}/\Delta\epsilon_{bf}$  vs.  $[DNA]$ .

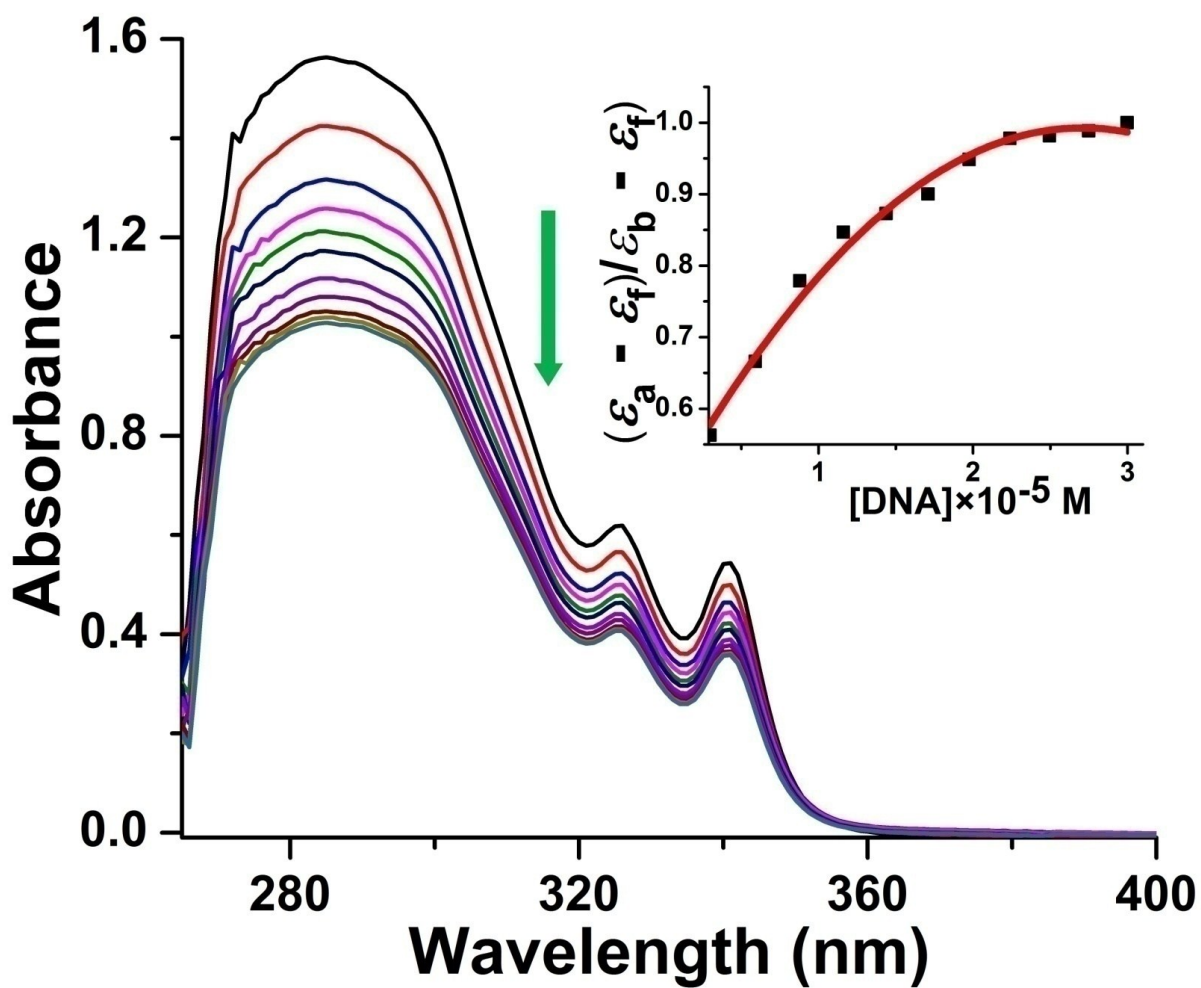

**Figure S18.** Absorption spectral traces of complex **3** (50  $\mu\text{M}$ ) in 5 mM Tris-HCl buffer (pH 7.2) with increasing the concentration of CT-DNA. Inset shows the plot of  $\Delta\epsilon_{af}/\Delta\epsilon_{bf}$  vs.  $[DNA]$ .

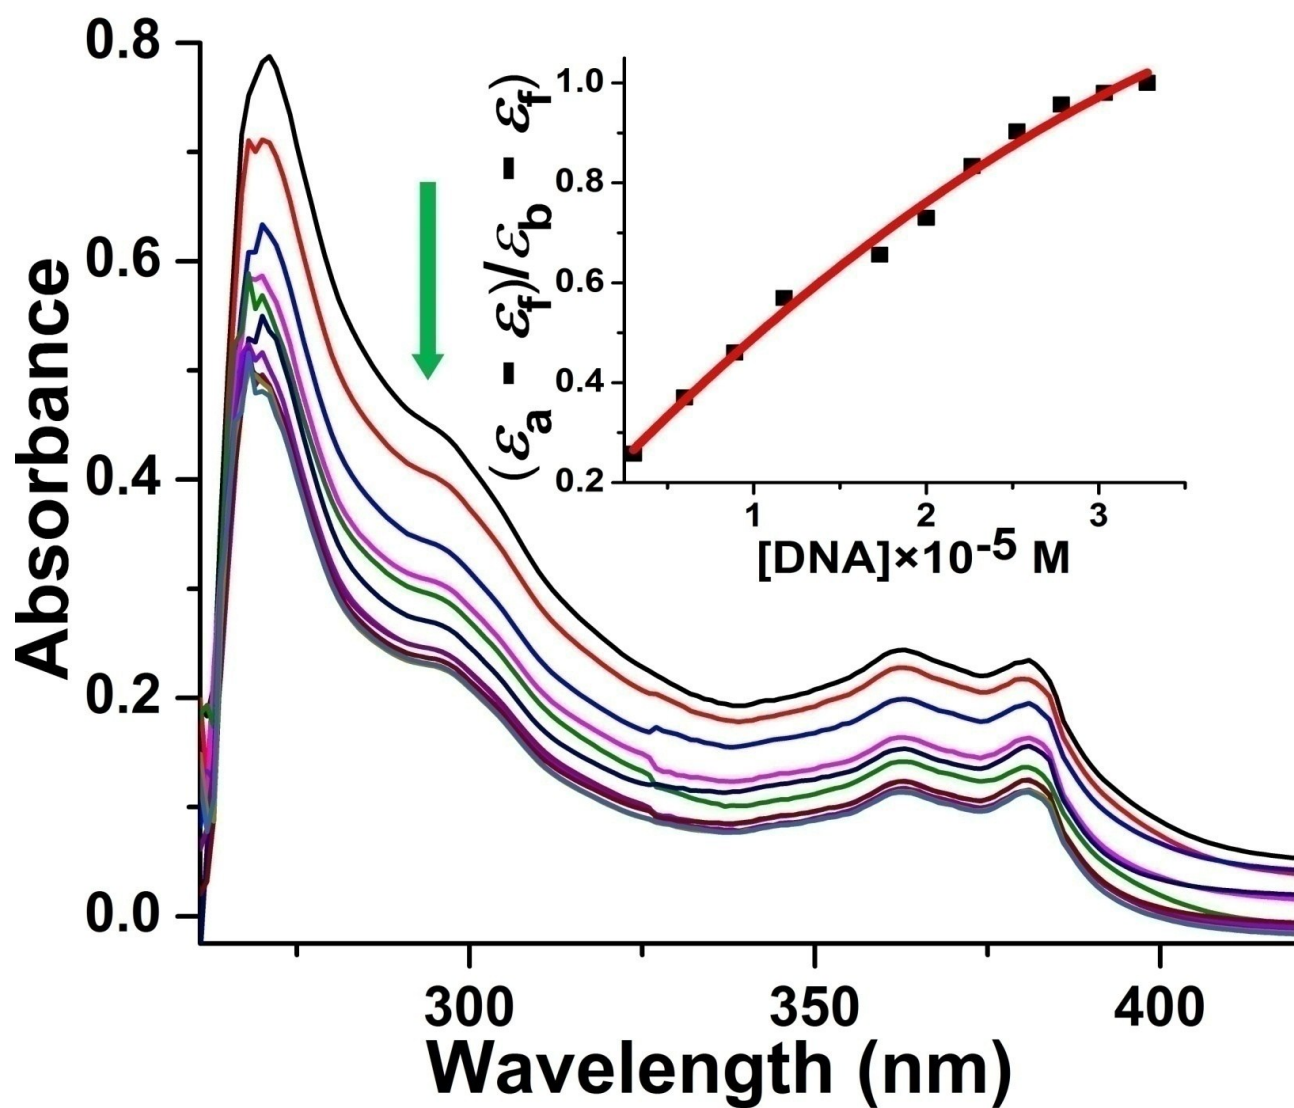

**Figure S19.** Absorption spectral traces of complex 4 (75 μM) in 5 mM Tris-HCl buffer (pH 7.2) with increasing the concentration of CT-DNA. Inset shows the plot of  $\Delta\epsilon_{af}/\Delta\epsilon_{bf}$  vs. [DNA].



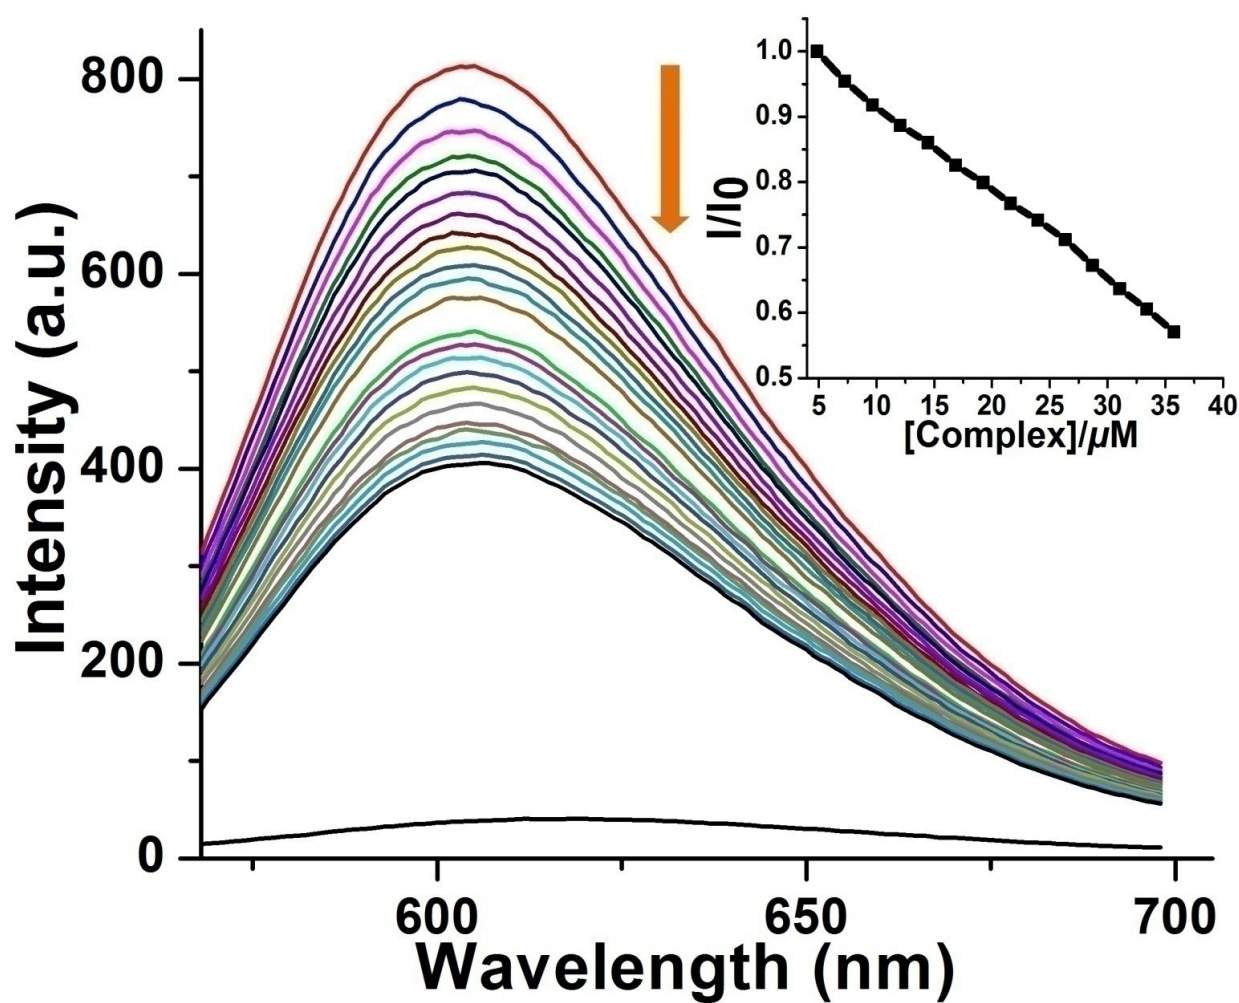

**Figure S20.** Emission spectral traces of ethidium bromide bound CT-DNA with varying concentration of complex **2** in 5mM Tris buffer (5 mM Tris-HCl + 5 mM NaCl, pH 7.2) at 25 °C.  $\lambda_{ex}$  = 546 nm,  $\lambda_{em}$  = 603 nm, [DNA] = 313  $\mu M$ , [EthB] = 12  $\mu M$ . The inset shows the plot of  $I/I_0$  vs. [complex].

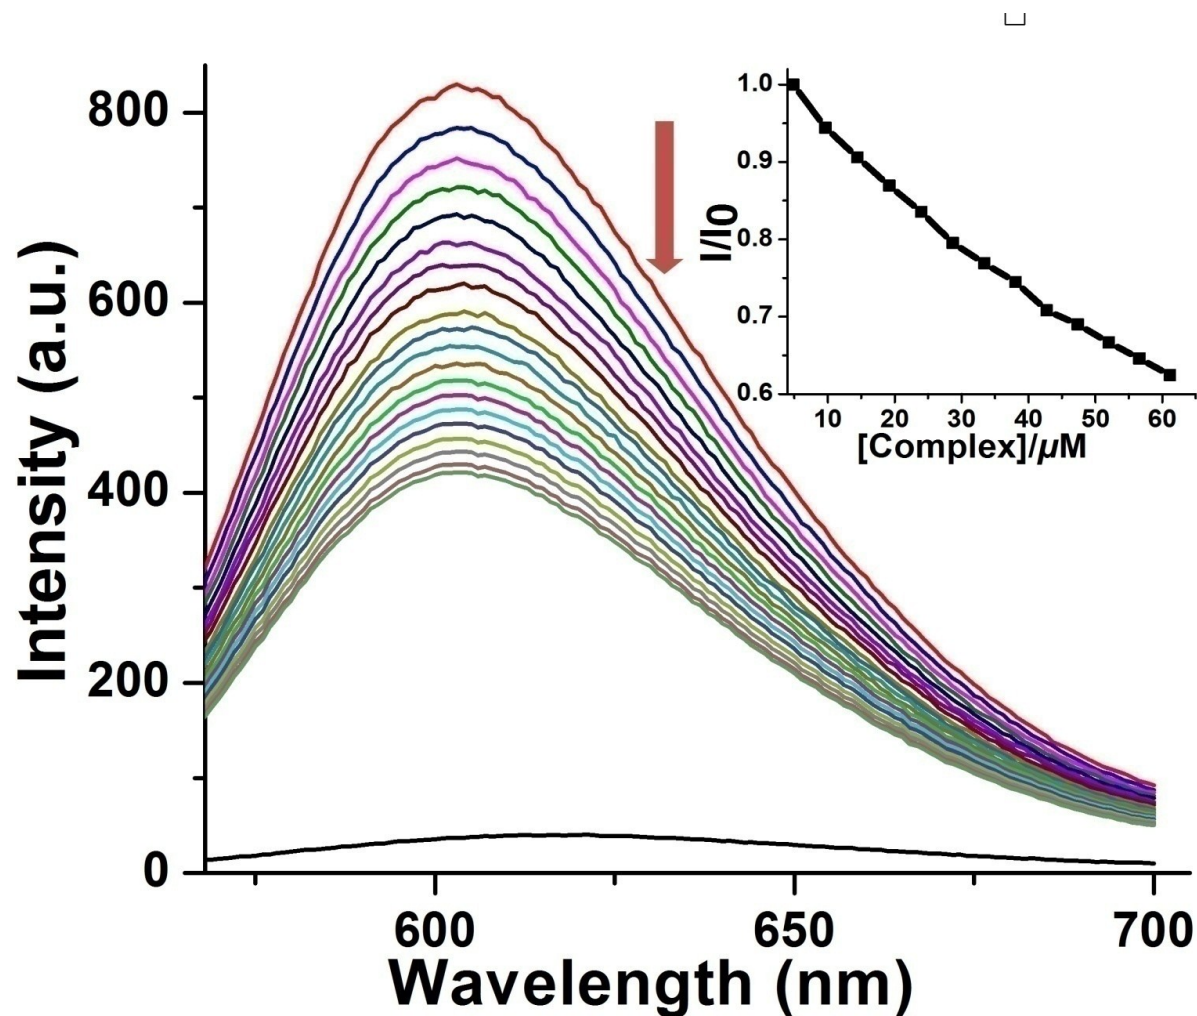

**Figure S21.** Emission spectral traces of ethidium bromide bound CT-DNA with varying concentration of complex **3** in 5mM Tris buffer (5 mM Tris-HCl + 5 mM NaCl, pH 7.2) at 25 °C.  $\lambda_{ex}$  = 546 nm,  $\lambda_{em}$  = 603 nm, [DNA] = 313  $\mu M$ , [EthB] = 12  $\mu M$ . The inset shows the plot of  $I/I_0$  vs. [complex].

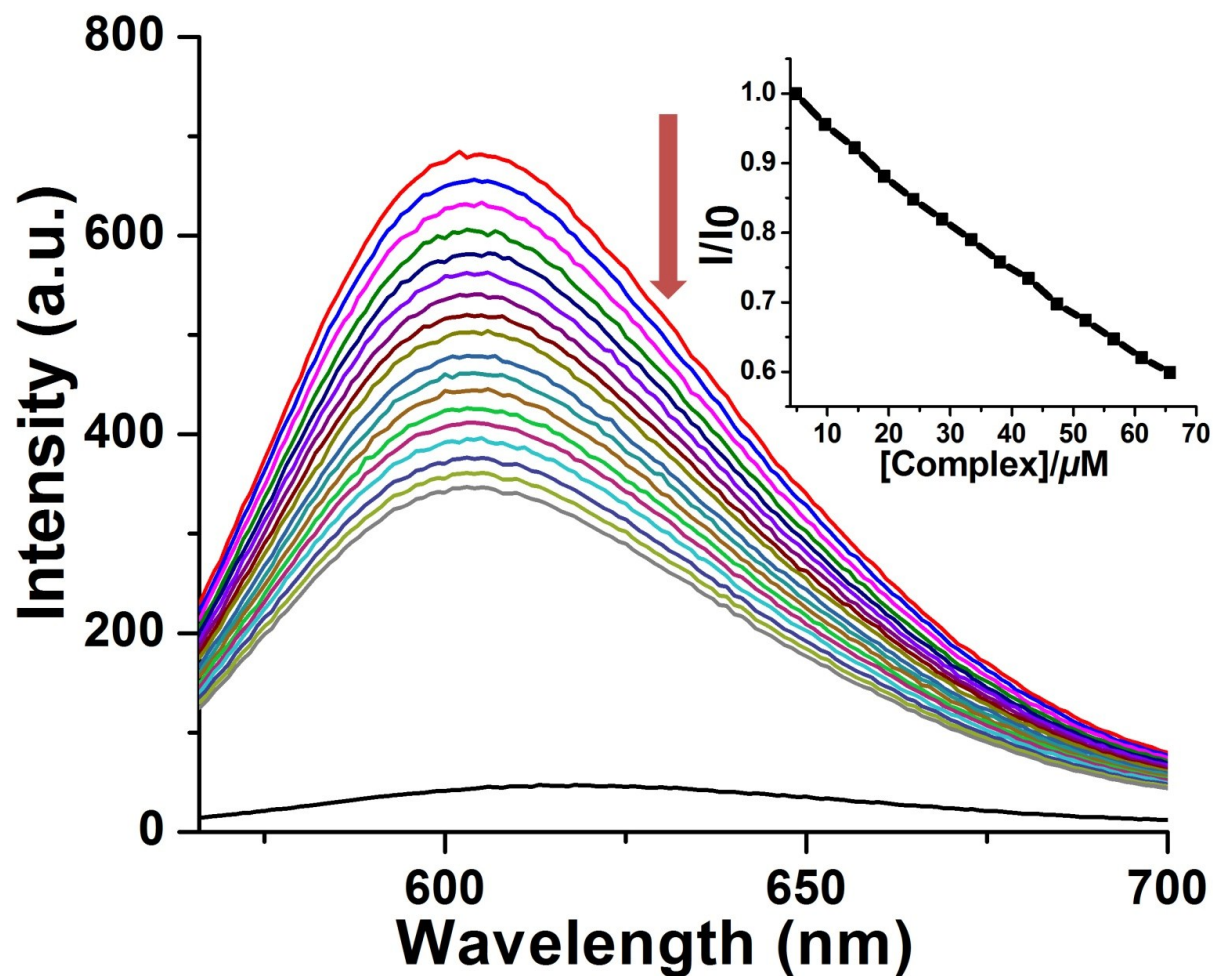

**Figure S22.** Emission spectral traces of ethidium bromide bound CT-DNA with varying concentration of complex 4 in 5mMTris buffer (5 mM Tris- HCl + 5 mM NaCl, pH 7.2) at 25 °C.  $\lambda_{ex}$ = 546 nm,  $\lambda_{em}$  = 603 nm, [DNA] = 313  $\mu M$ , [EthB] = 12  $\mu M$ . The inset shows the plot of  $I/I_0$  vs. [complex].



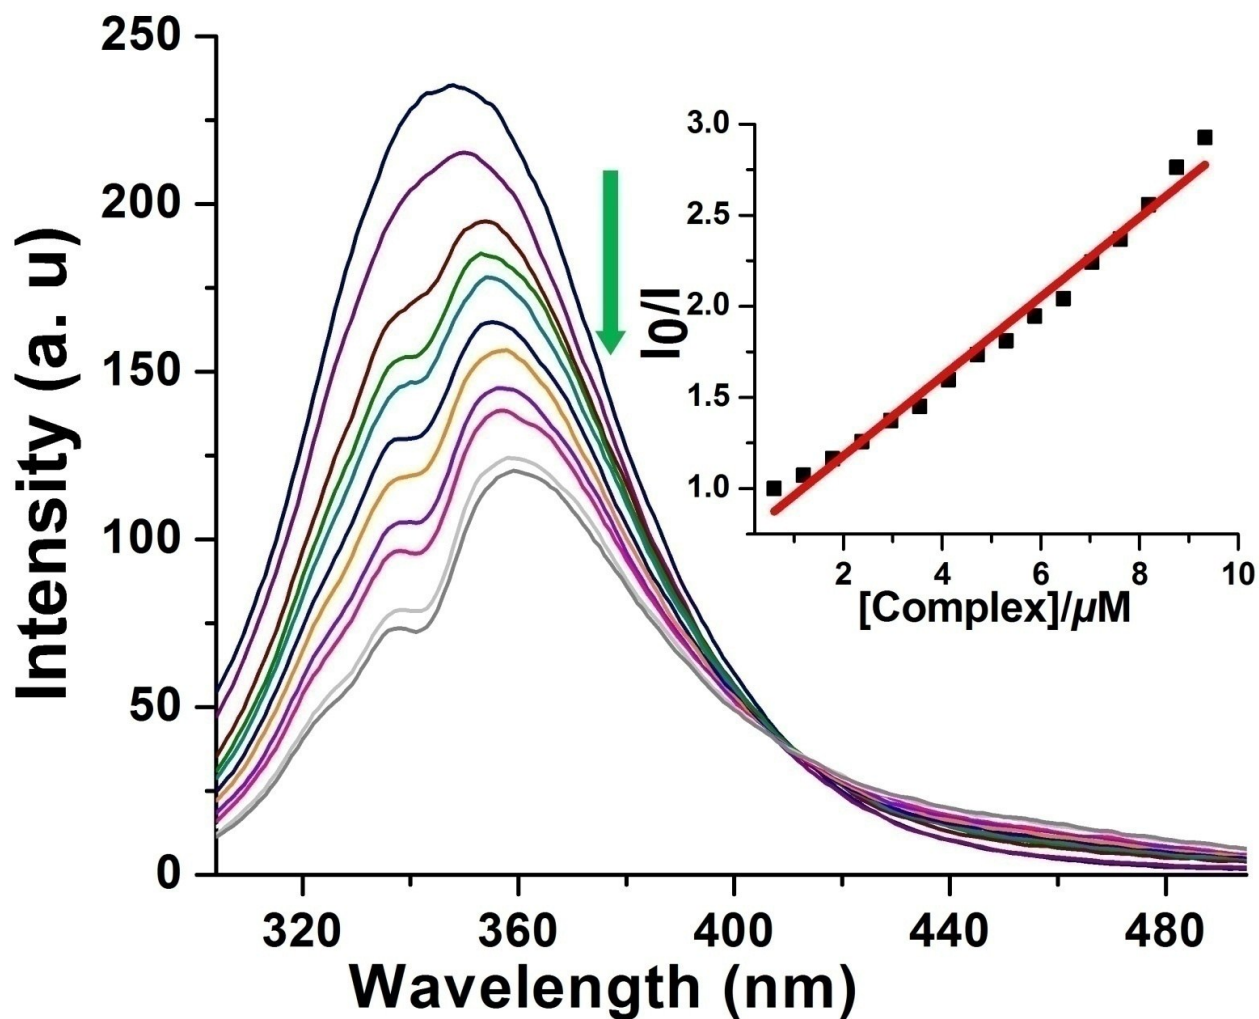

**Figure S23.** Emission spectral traces of bovine serum albumin (BSA) protein (5  $\mu\text{M}$ ) in the presence of complex 1. The arrow shows the intensity changes on increasing complex concentration. The inset shows the plot of  $(I_0/I)$  vs. [complex].

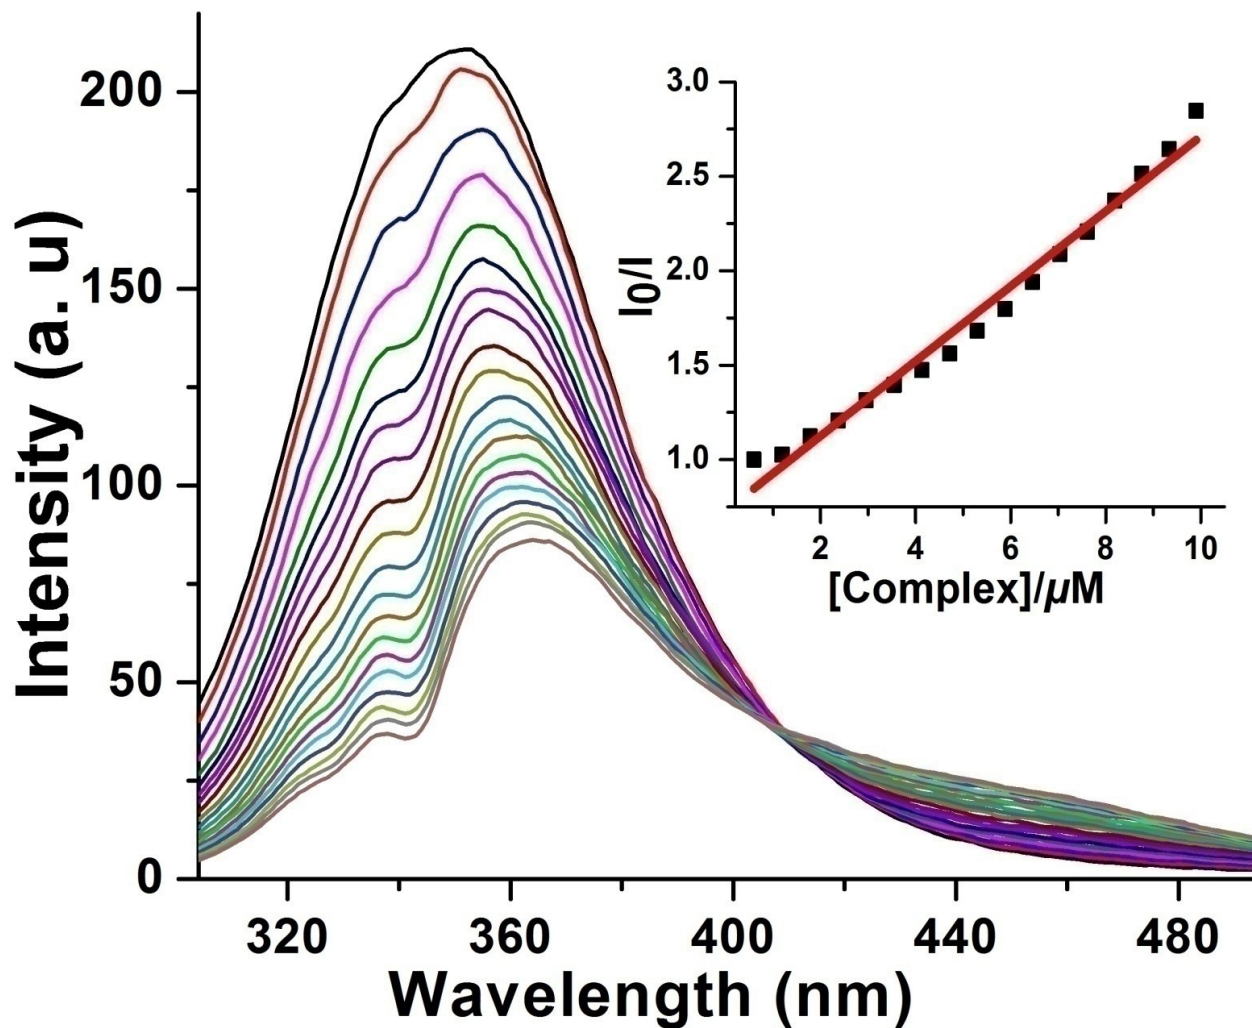

**Figure S24.** Emission spectral traces of bovine serum albumin (BSA) protein (5  $\mu\text{M}$ ) in the presence of complex 3. The arrow shows the intensity changes on increasing complex concentration. The inset shows the plot of  $(I_0/I)$  vs.  $[\text{complex}]$ .

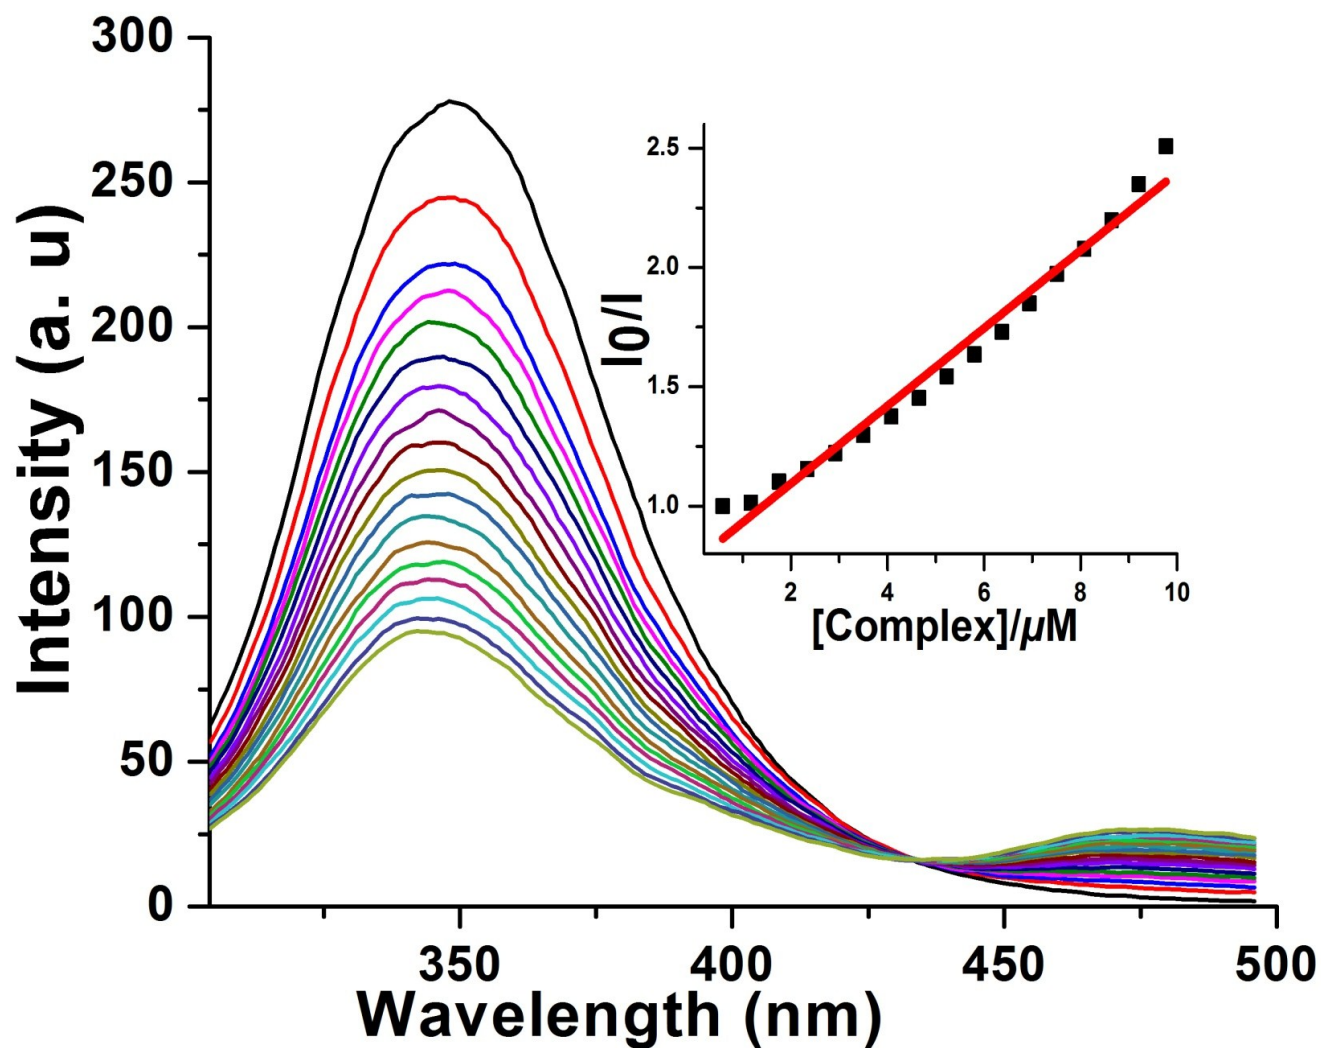

**Figure S25.** Emission spectral traces of bovine serum albumin (BSA) protein (5  $\mu\text{M}$ ) in the presence of complex 4. The arrow shows the intensity changes on increasing complex concentration. The inset shows the plot of  $(I_0/I)$  vs. [complex].

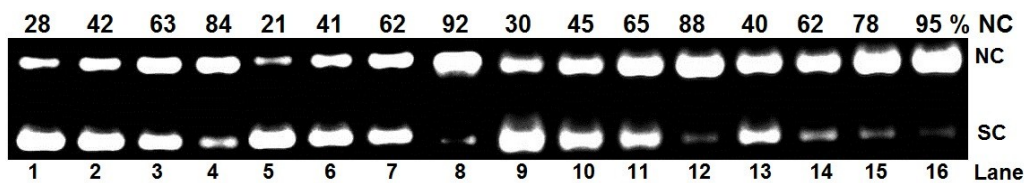

**Figure S26.** Gel electrophoresis diagram showing the cleavage of SC pUC19 DNA (30 $\mu$ M, 0.2 $\mu$ g) incubated with complexes **1-4** (20  $\mu$ M) in 50 mM Tris-HCl/NaCl buffer (pH, 7.2) at 37  $^{\circ}$ C for 1 h on irradiation with UV-A light of 365 nm (6 W) at different time. Detailed conditions are given below in a tabular form.

| Lane No. | Reaction Condition | $\lambda$ /nm | Exposure time<br>(t/min) | %NC |
|----------|--------------------|---------------|--------------------------|-----|
| 1        | DNA+ <b>1</b>      | 365           | 30                       | 28  |
| 2        | DNA+ <b>1</b>      | 365           | 60                       | 42  |
| 3        | DNA+ <b>1</b>      | 365           | 90                       | 63  |
| 4        | DNA+ <b>1</b>      | 365           | 120                      | 84  |
| 5        | DNA+ <b>2</b>      | 365           | 30                       | 21  |
| 6        | DNA+ <b>2</b>      | 365           | 60                       | 41  |
| 7        | DNA+ <b>2</b>      | 365           | 90                       | 62  |
| 8        | DNA+ <b>2</b>      | 365           | 120                      | 92  |
| 9        | DNA+ <b>3</b>      | 365           | 30                       | 30  |
| 10       | DNA+ <b>3</b>      | 365           | 60                       | 45  |
| 11       | DNA+ <b>3</b>      | 365           | 90                       | 65  |
| 12       | DNA+ <b>3</b>      | 365           | 120                      | 88  |
| 13       | DNA+ <b>4</b>      | 365           | 30                       | 40  |
| 14       | DNA+ <b>4</b>      | 365           | 60                       | 62  |
| 15       | DNA+ <b>4</b>      | 365           | 90                       | 78  |
| 16       | DNA+ <b>4</b>      | 365           | 120                      | 95  |

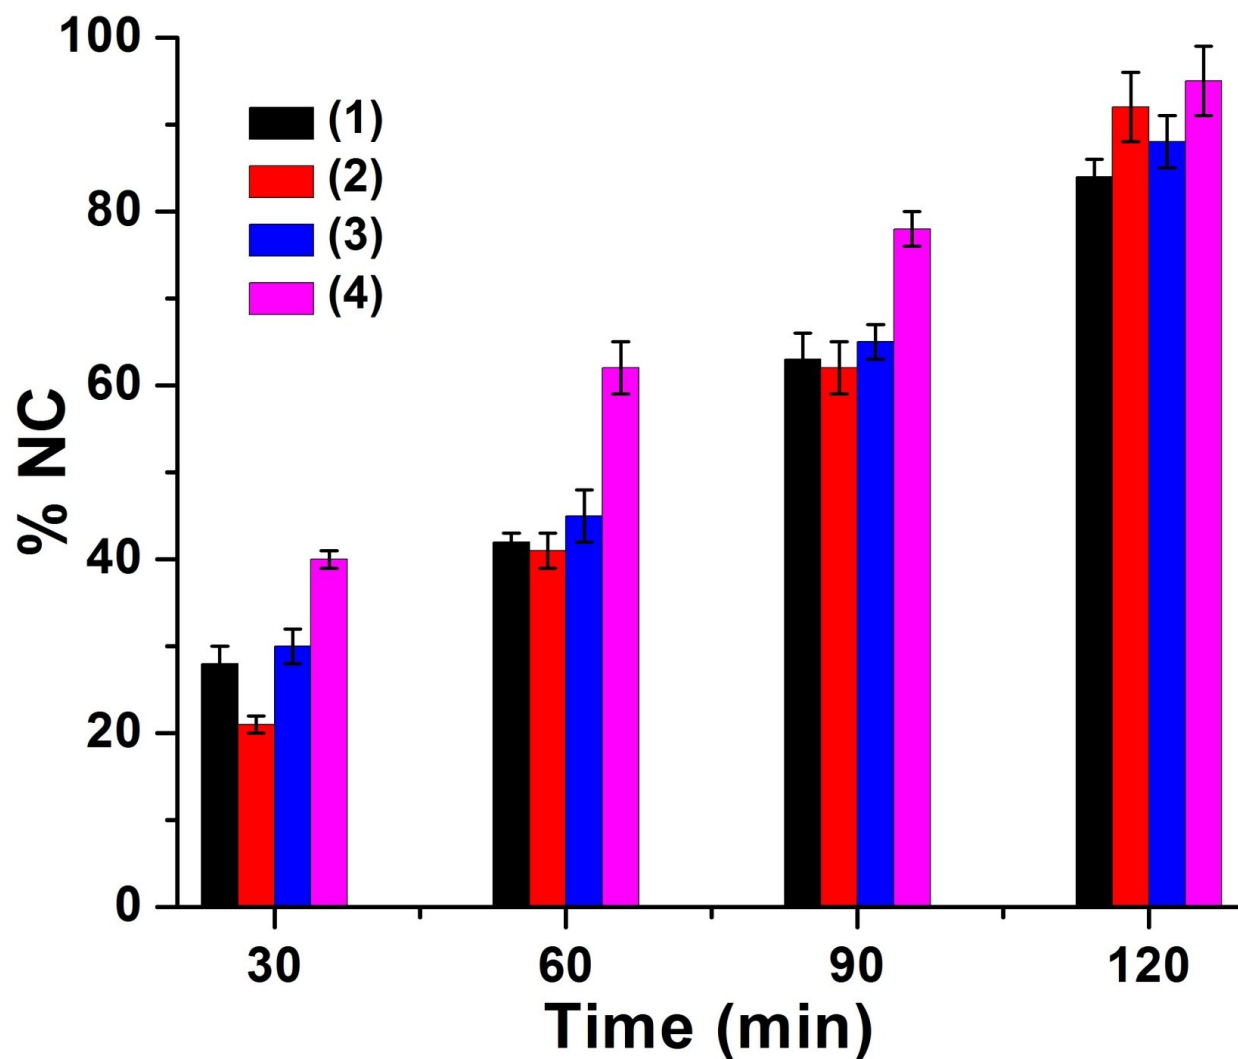

**Figure S27.** Bar diagram showing the photocleavage of SC pUC19 DNA ( $30\mu\text{M}$ ,  $0.2\mu\text{g}$ ) with complexes **1-4** ( $20\mu\text{M}$ ) in 50 mM Tris-HCl/NaCl buffer (pH, 7.2) on irradiation with UV-A light of 365 nm (6 W) with varying time. The plot was made with data from gel electrophoresis diagram in Fig. S28.

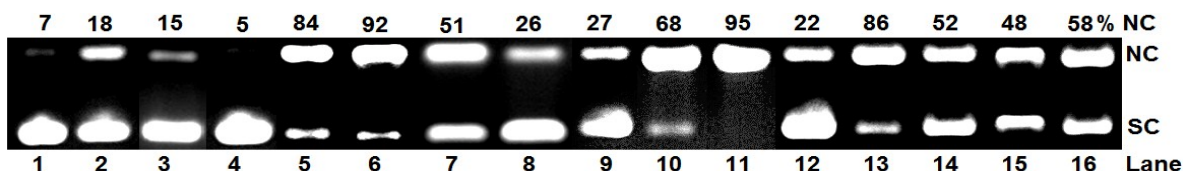

**Figure S28.** Gel electrophoresis diagram showing the cleavage of SC pUC19 DNA (30 $\mu$ M, 0.2 $\mu$ g) incubated with complexes **1** and **2** (20  $\mu$ M) in 50 mM Tris-HCl/NaCl buffer (pH, 7.2) at 37  $^{\circ}$ C for 1 h on irradiation with UV-A light of 365 nm (6 W) for 2 h: lane 1, DNA control; lane 2, DNA + dpq (20  $\mu$ M); lane 3, DNA + dppz (20  $\mu$ M); lane 4, DNA + SmCl<sub>3</sub>·6H<sub>2</sub>O (20  $\mu$ M); lane 5, DNA + **1**; lane 6, DNA + **2**; lane 7, DNA + **1** + DMSO (4  $\mu$ L); lane 8, DNA + **1** + KI (200  $\mu$ M); lane 9, DNA + **1** + NaN<sub>3</sub> (400  $\mu$ M); lane 10, DNA + **1** + L-histidine (400  $\mu$ M); lane 11, DNA + **1** + D<sub>2</sub>O (16  $\mu$ L); lane 12, DNA + methyl green (200  $\mu$ M); lane 13, DNA + **1** + methyl green (200  $\mu$ M); lane 14, DNA + **1** + catalase (200  $\mu$ M); lane 15, DNA + **2** + methyl green (200  $\mu$ M); lane 16, DNA + **2** + catalase (200  $\mu$ M).

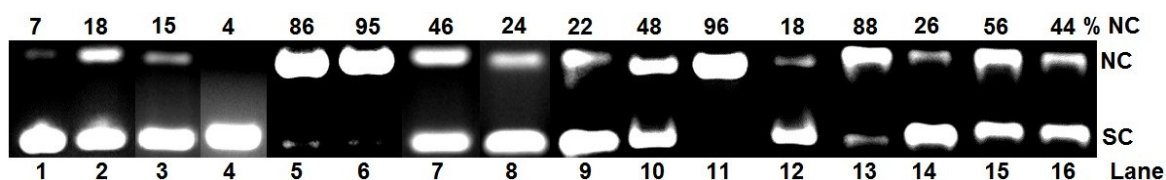

**Figure S29.** Gel electrophoresis diagram showing the cleavage of SC pUC19 DNA (30 $\mu$ M, 0.2 $\mu$ g) incubated with complexes **3** and **4** (10  $\mu$ M) in 50 mM Tris-HCl/NaCl buffer (pH, 7.2) at 37  $^{\circ}$ C for 1 h on irradiation with UV-A light of 365 nm (6 W) for 2 h: lane 1, DNA control; lane 2, DNA + dpq (20  $\mu$ M); lane 3, DNA + dppz (20  $\mu$ M); lane 4, DNA + SmCl<sub>3</sub>·6H<sub>2</sub>O (20  $\mu$ M); lane 5, DNA + **3**; lane 6, DNA + **4**; lane 7, DNA + **4** + DMSO (4  $\mu$ L); lane 8, DNA + **4** + KI (200  $\mu$ M); lane 9, DNA + **4** + NaN<sub>3</sub> (400  $\mu$ M); lane 10, DNA + **4** + L-histidine (400  $\mu$ M); lane 11, DNA + **4** + D<sub>2</sub>O (16  $\mu$ L); lane 12, DNA + methyl green (200  $\mu$ M); lane 13, DNA + **3** + methyl green (200  $\mu$ M); lane 14, DNA + **4** + methyl green (200  $\mu$ M); lane 15, DNA + **3** + catalase (200  $\mu$ M); lane 16, DNA + **4** + catalase (200  $\mu$ M).

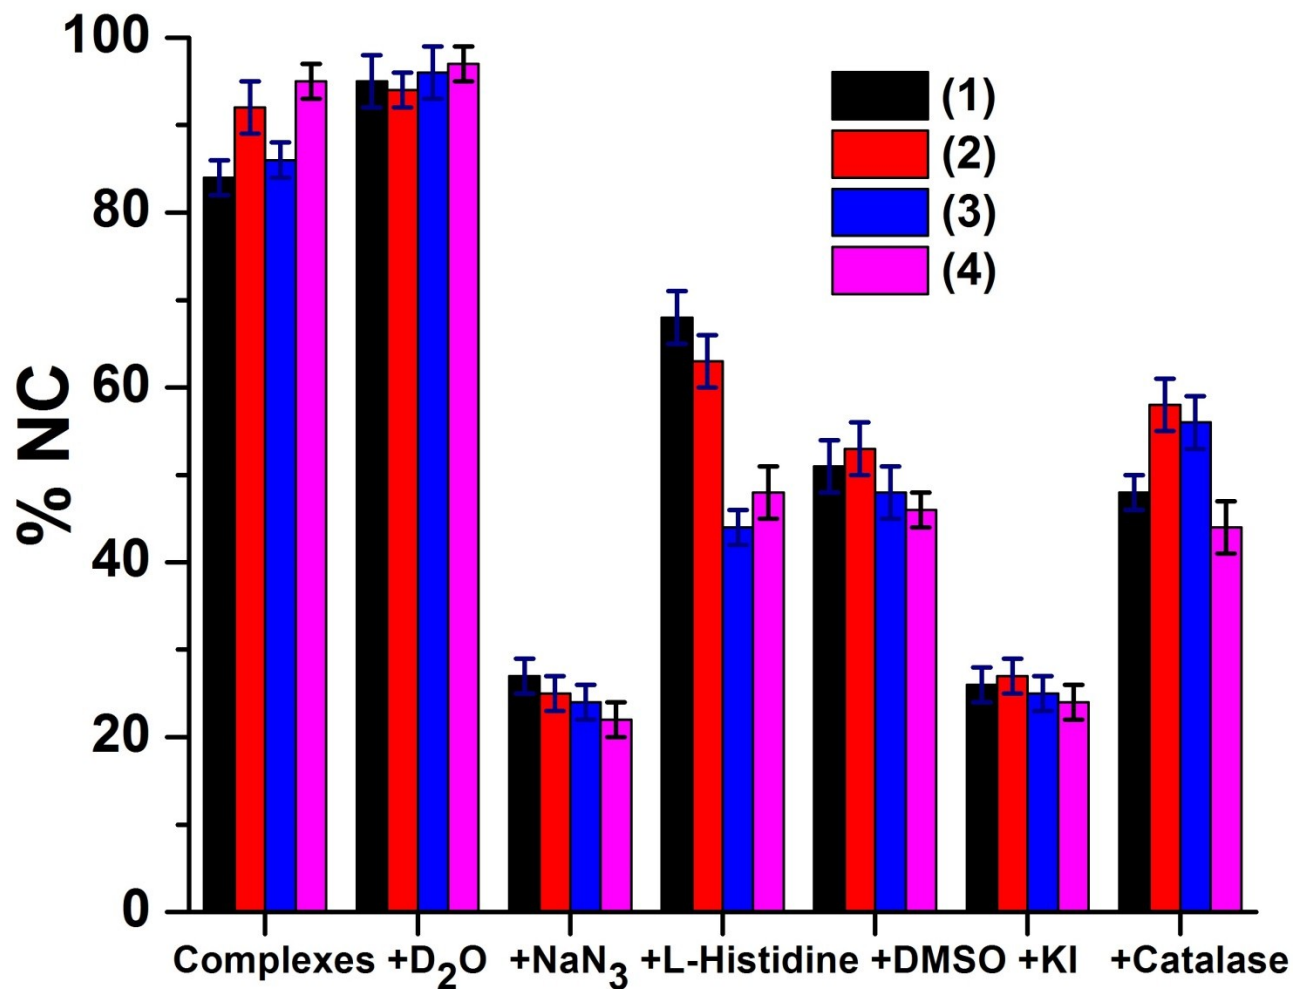

**Figure S30.** Bar diagram of for the cleavage of SC pUC19 DNA (30  $\mu$ M, 0.2  $\mu$ g) by complexes 1-4 (20  $\mu$ M) on photoexposure at 365 nm(6W) for 2 h in the presence of various additives in Tris-HCl/NaCl buffer. The additive concentrations/quantities are NaN<sub>3</sub>, 0.2mM; KI, 0.2 mM; D<sub>2</sub>O, 16  $\mu$ L; L-histidine, 0.2 mM; DMSO, 4 $\mu$ L; Catalase, 4 units.
